# Supplementary material for: Investigation of the Formation, Characterization, and Oxidative Catalytic Valorization of Humins
Source: MDPI journal article supplement (doi:10.3390/ma16072864), 2023-04-04
Supplement: s1 [file s1]

## Supporting Information

### Humin Synthesis

#### NMR spectra:

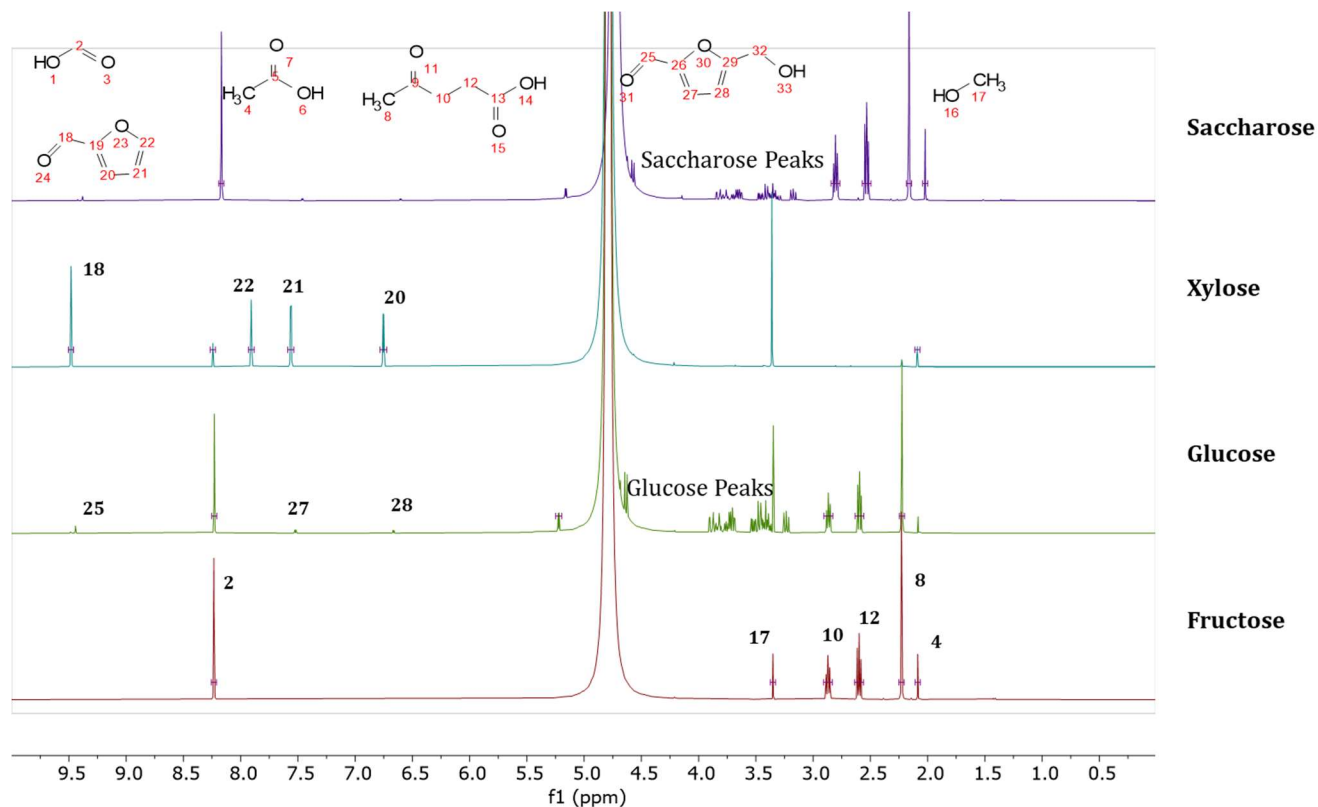

Figure S1:  $^1\text{H}$ -NMR spectra of humins synthesized in sulfuric acid and water taken in  $\text{D}_2\text{O}$

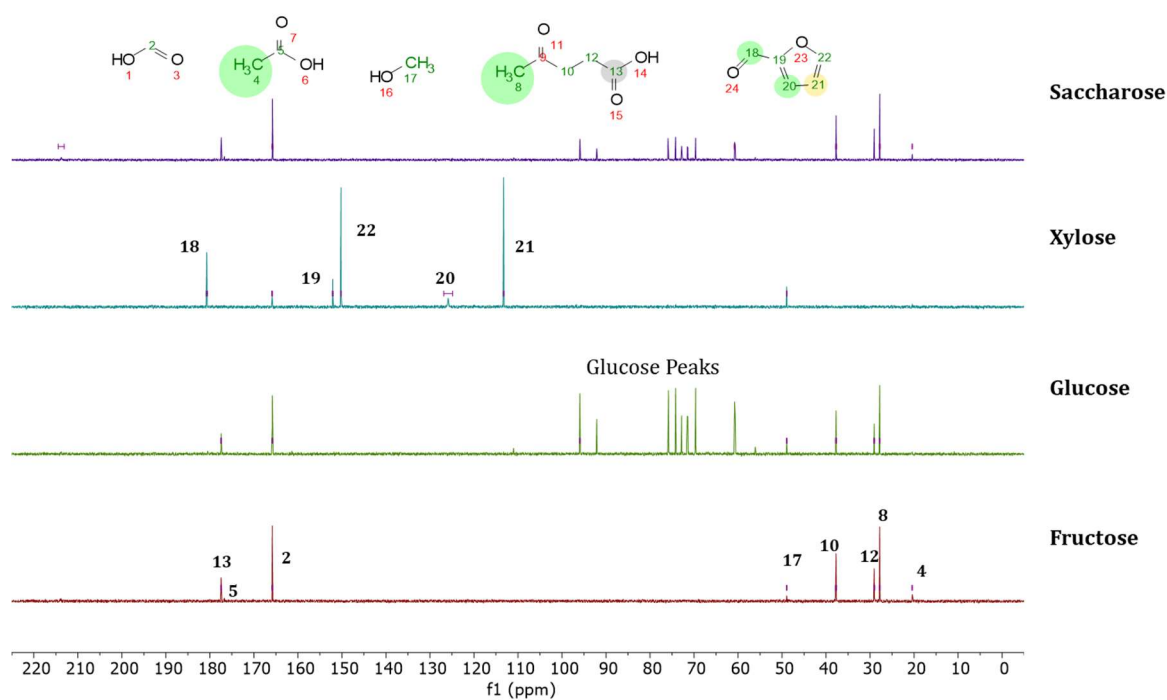

Figure S2:  $^{13}\text{C}$ -NMR spectra of humin synthesized in sulfuric acid and water taken in  $\text{D}_2\text{O}$

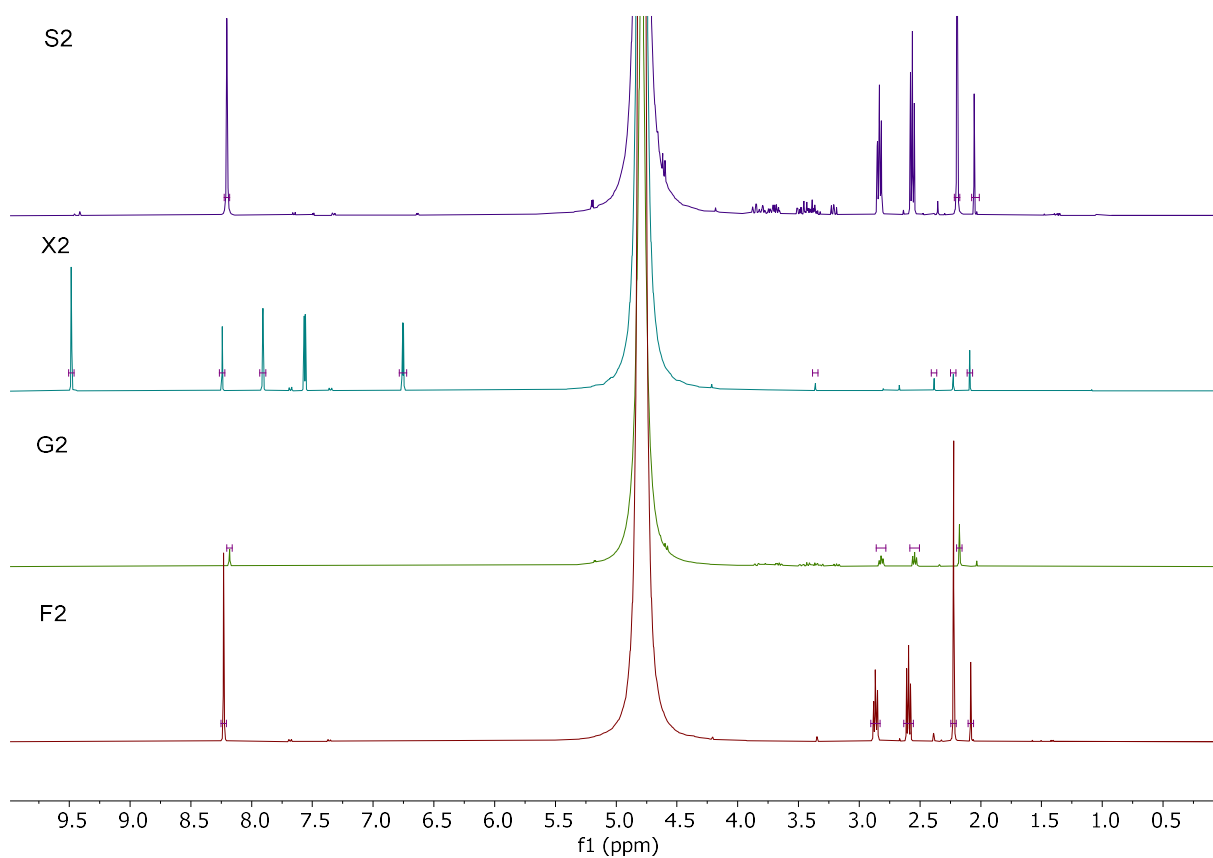

Figure S3:  $^1\text{H}$ -NMR spectra of humins synthesized in *para* toluenesulfonic acid and water taken in  $\text{D}_2\text{O}$

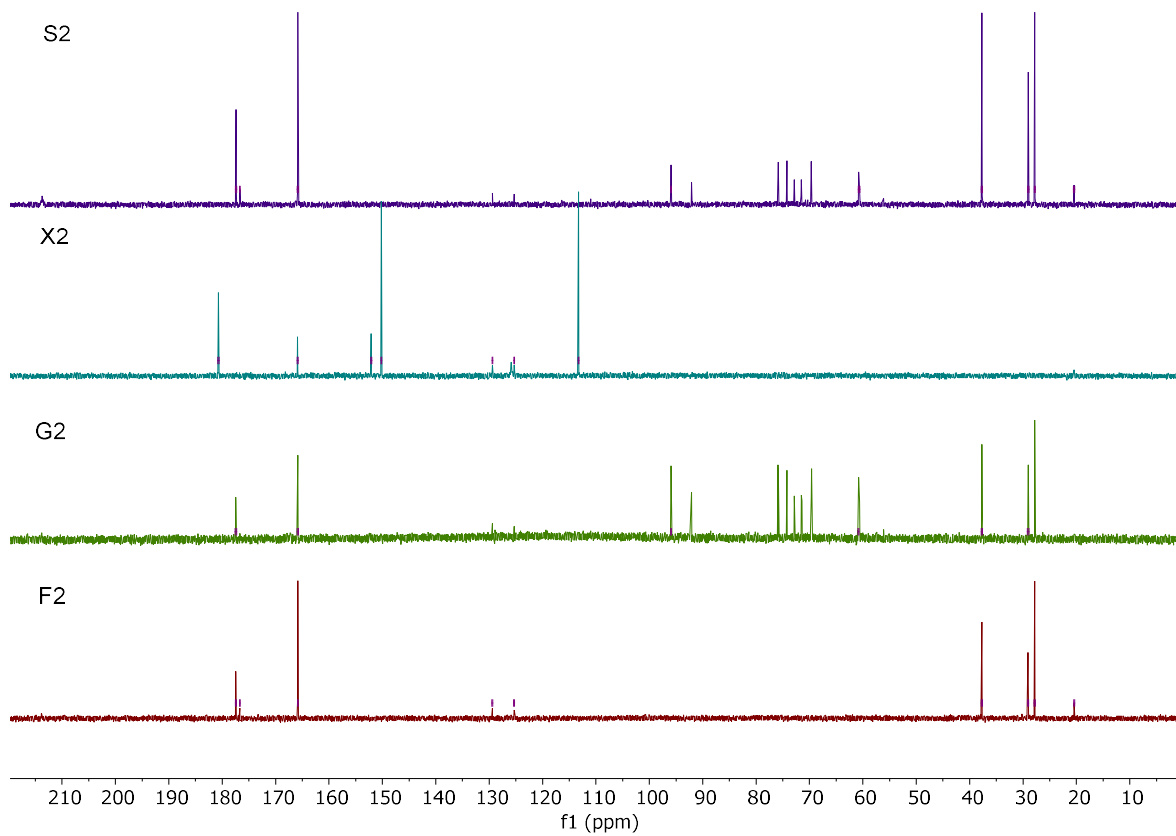

Figure S4:  $^{13}\text{C}$ -NMR spectra of humins synthesized in *para* toluenesulfonic acid and water taken in  $\text{D}_2\text{O}$

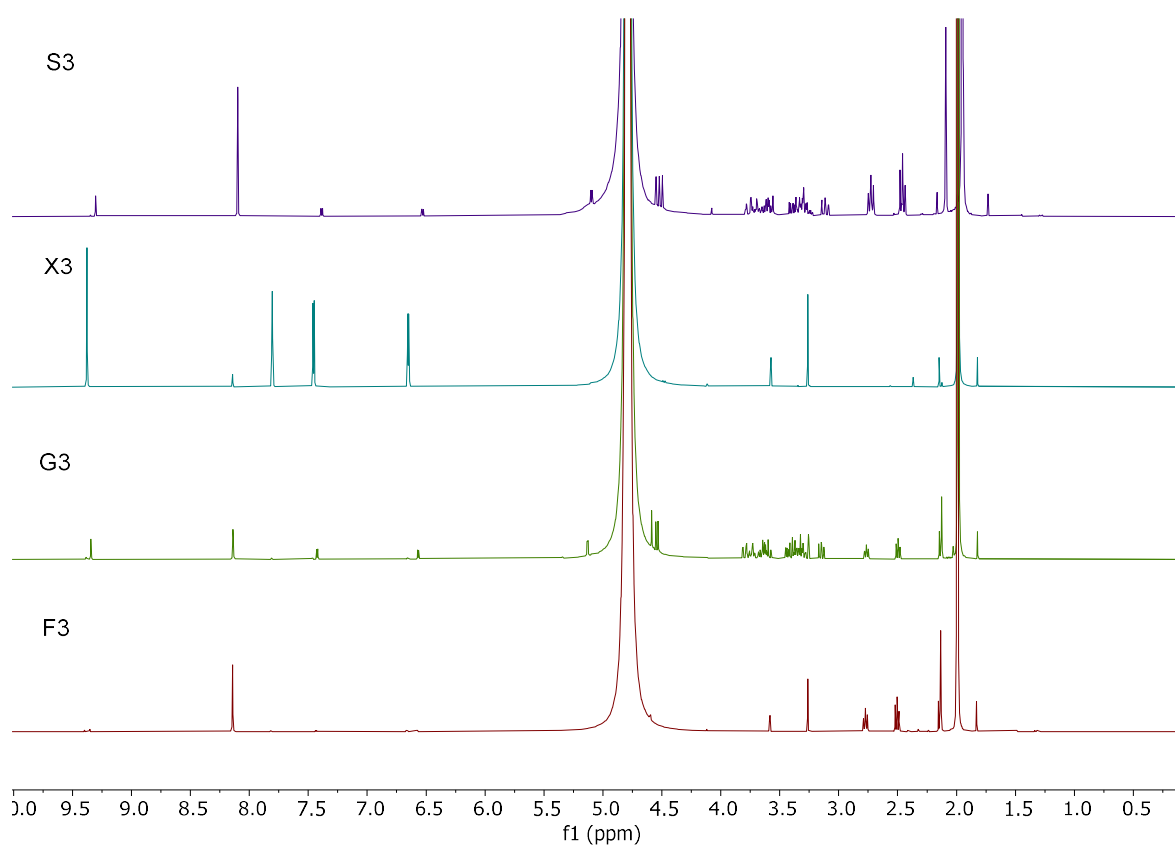

Figure S5:  $^1\text{H}$ -NMR spectra of humins synthesized in acetic acid and water taken in  $\text{D}_2\text{O}$

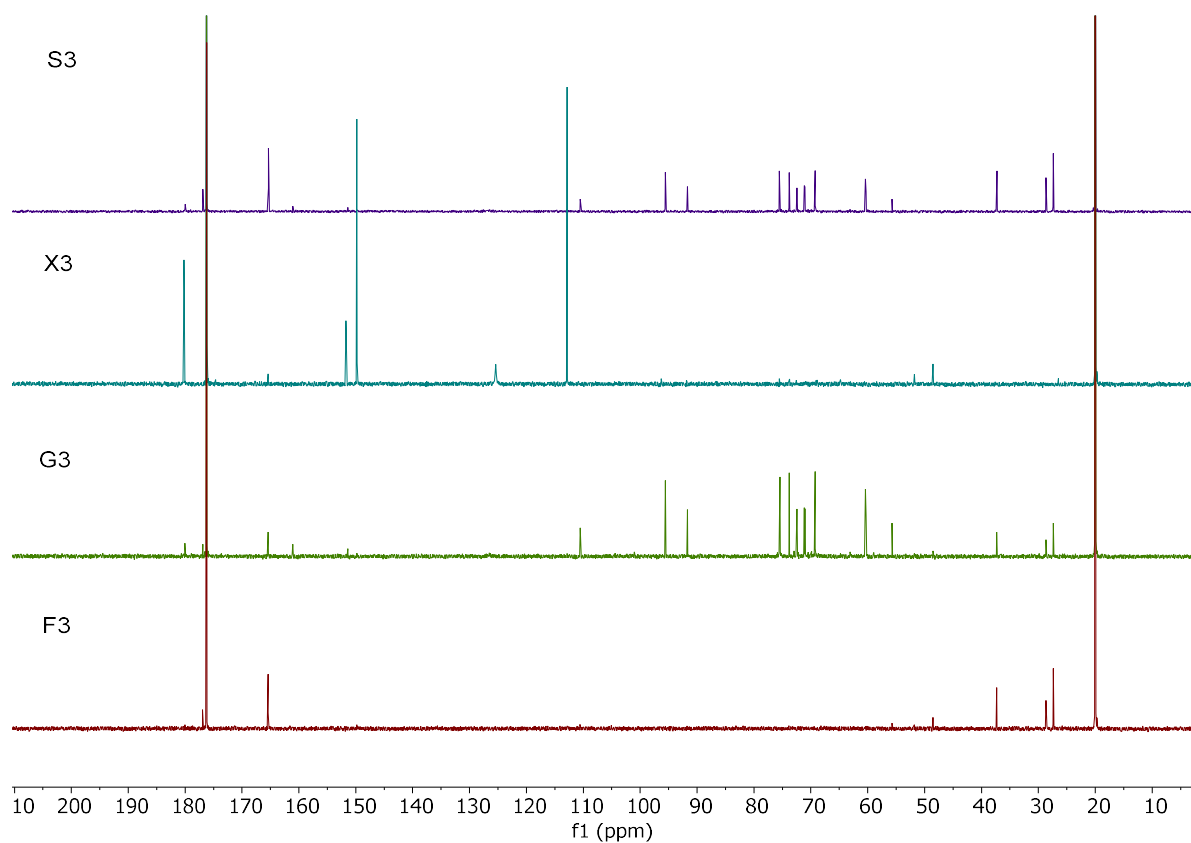

Figure S6:  $^{13}\text{C}$ -NMR spectra of humins synthesized in acetic acid and water taken in  $\text{D}_2\text{O}$

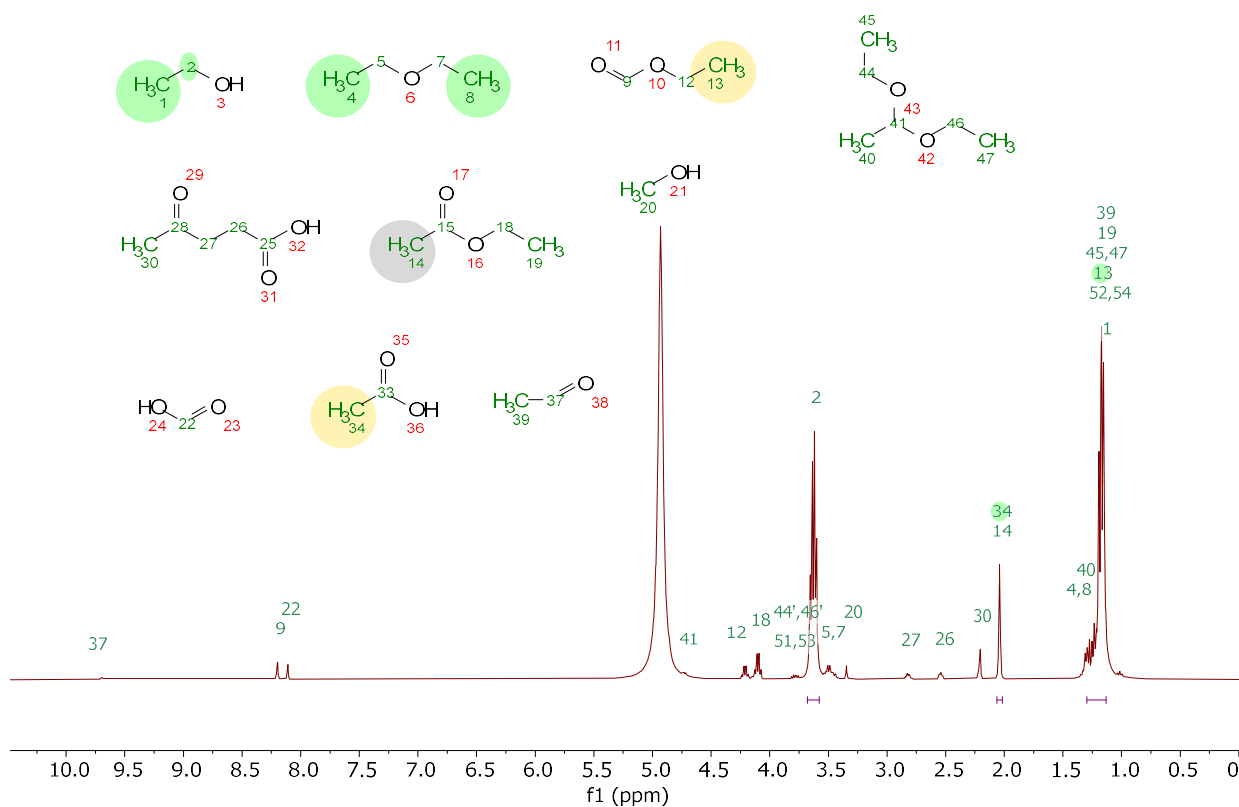

Figure S7:  $^1\text{H}$ -NMR spectra of F4 taken in  $\text{D}_2\text{O}$

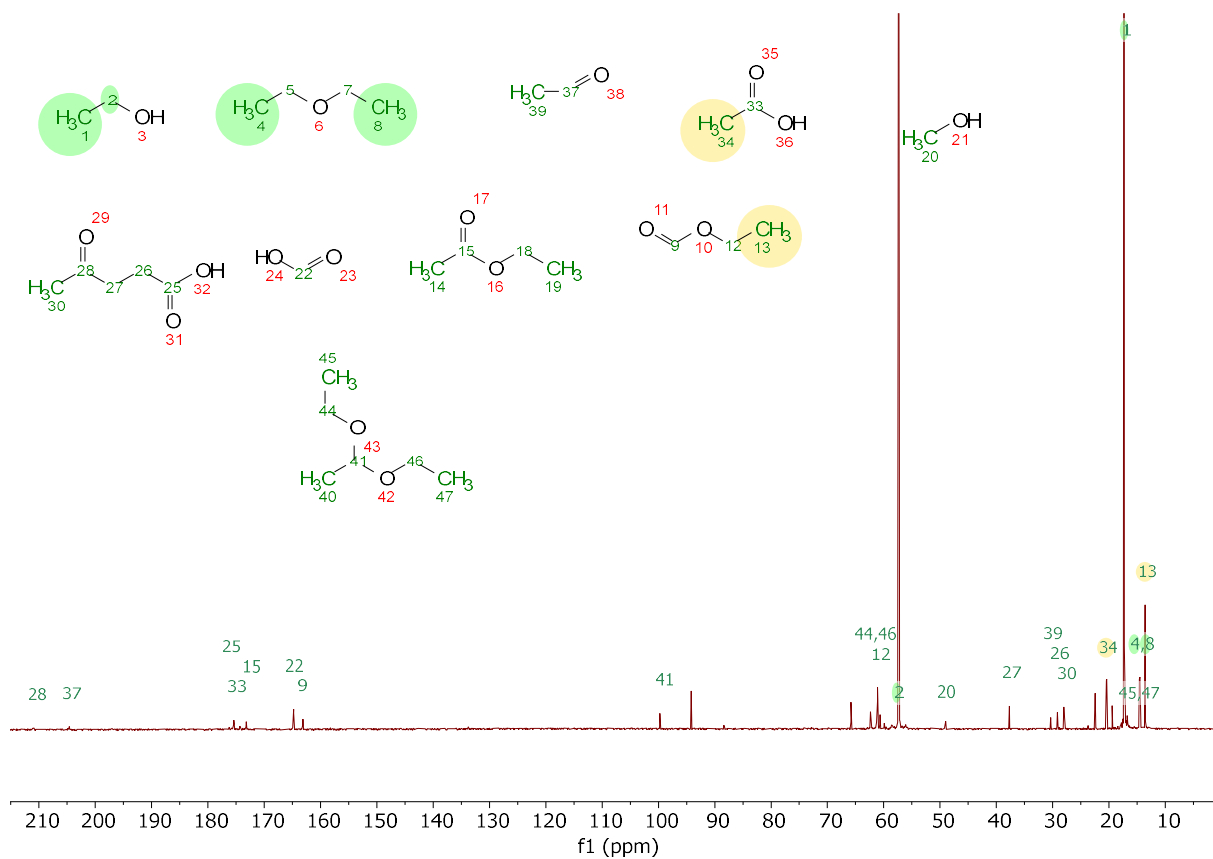

Figure S8:  $^{13}\text{C}$ -NMR spectra of F4 taken in  $\text{D}_2\text{O}$

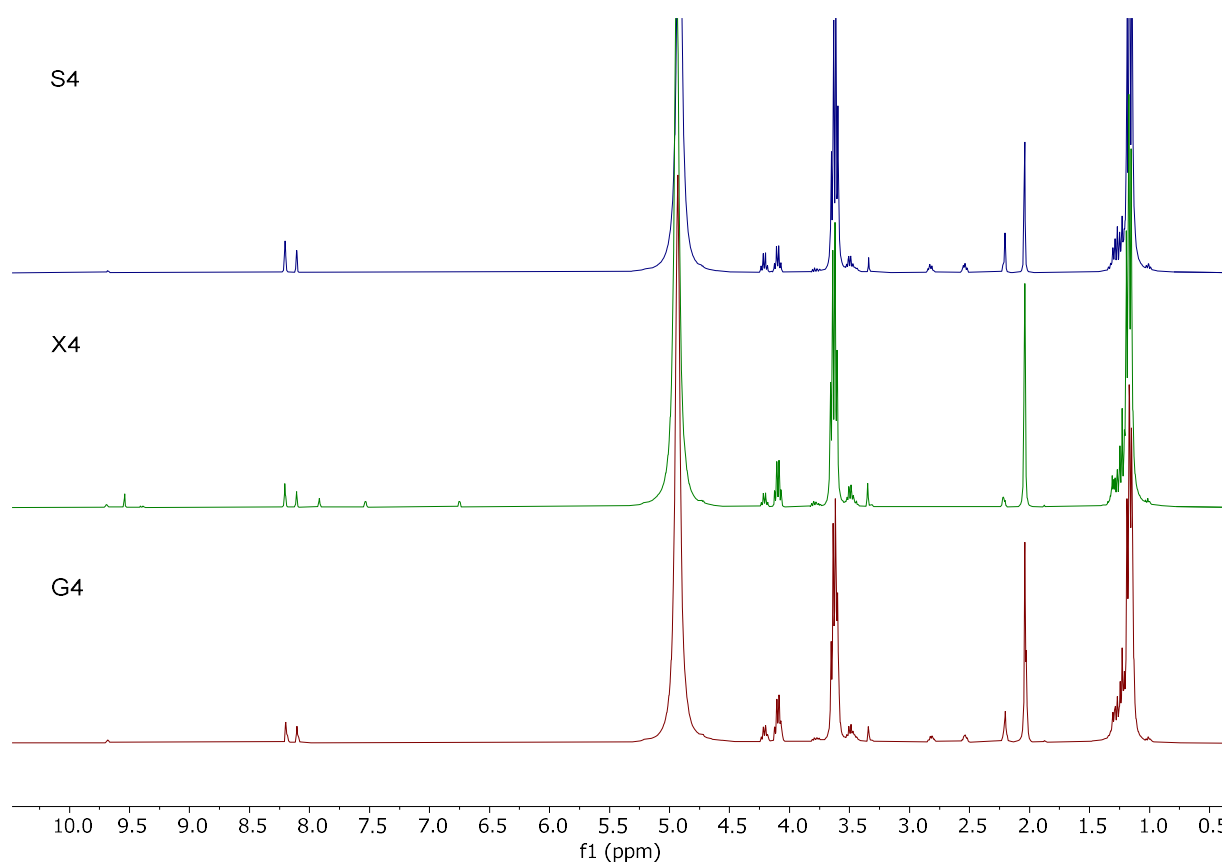

Figure S9:  $^1\text{H}$ -NMR spectra of humins synthesized in sulfuric acid and water/ethanol

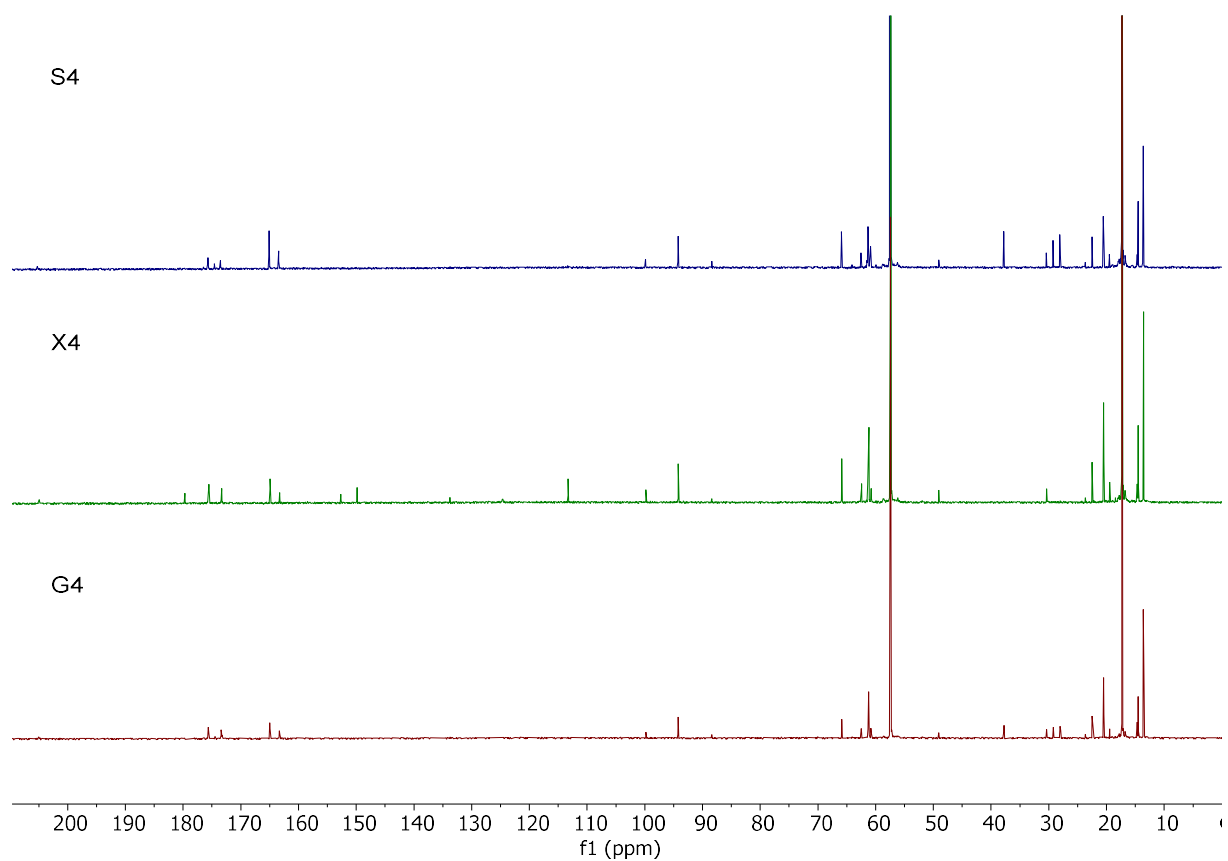

Figure S10:  $^{13}\text{C}$ -NMR spectra of humins synthesized in sulfuric acid and water/ethanol taken in  $\text{D}_2\text{O}$

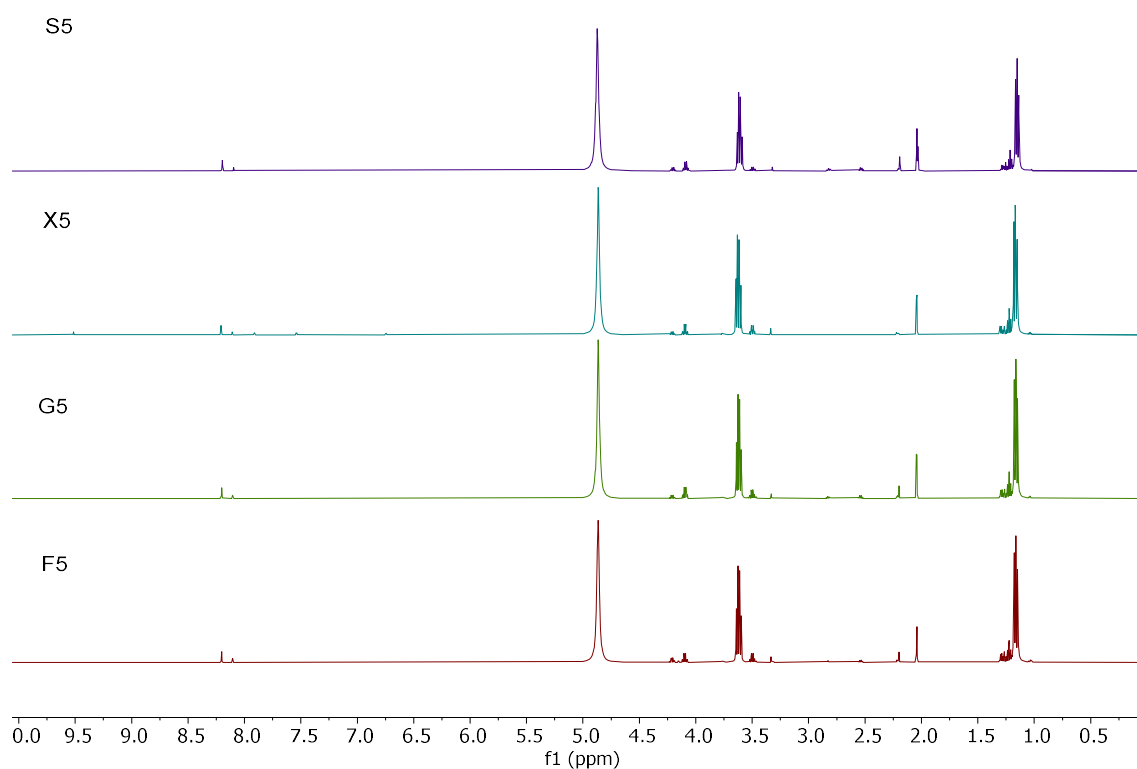

Figure S11:  $^1\text{H}$ -NMR spectra of humins synthesized in *para* toluene sulfonic acid and water/ethanol taken in  $\text{D}_2\text{O}$

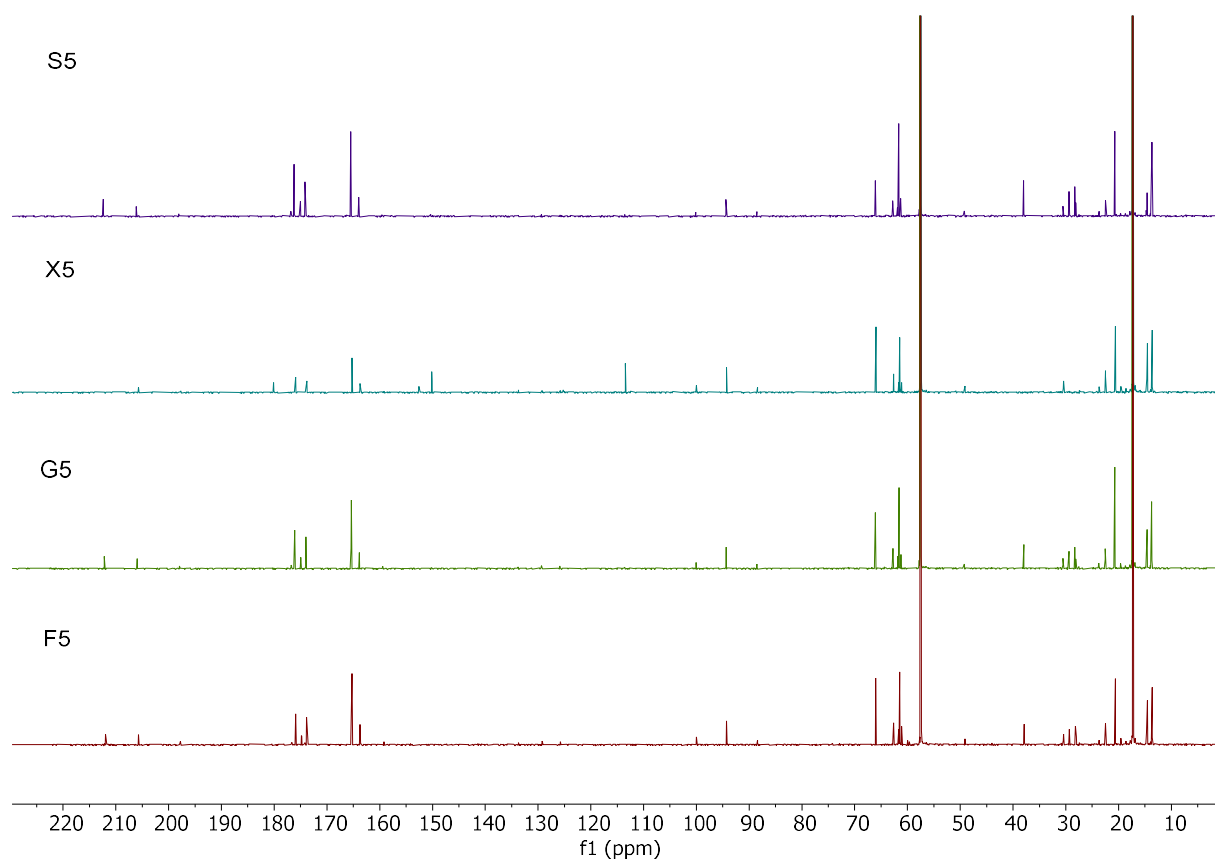

Figure S12:  $^{13}\text{C}$ -NMR spectra of humins synthesized in *para* toluenesulfonic acid and water/ethanol taken in  $\text{D}_2\text{O}$

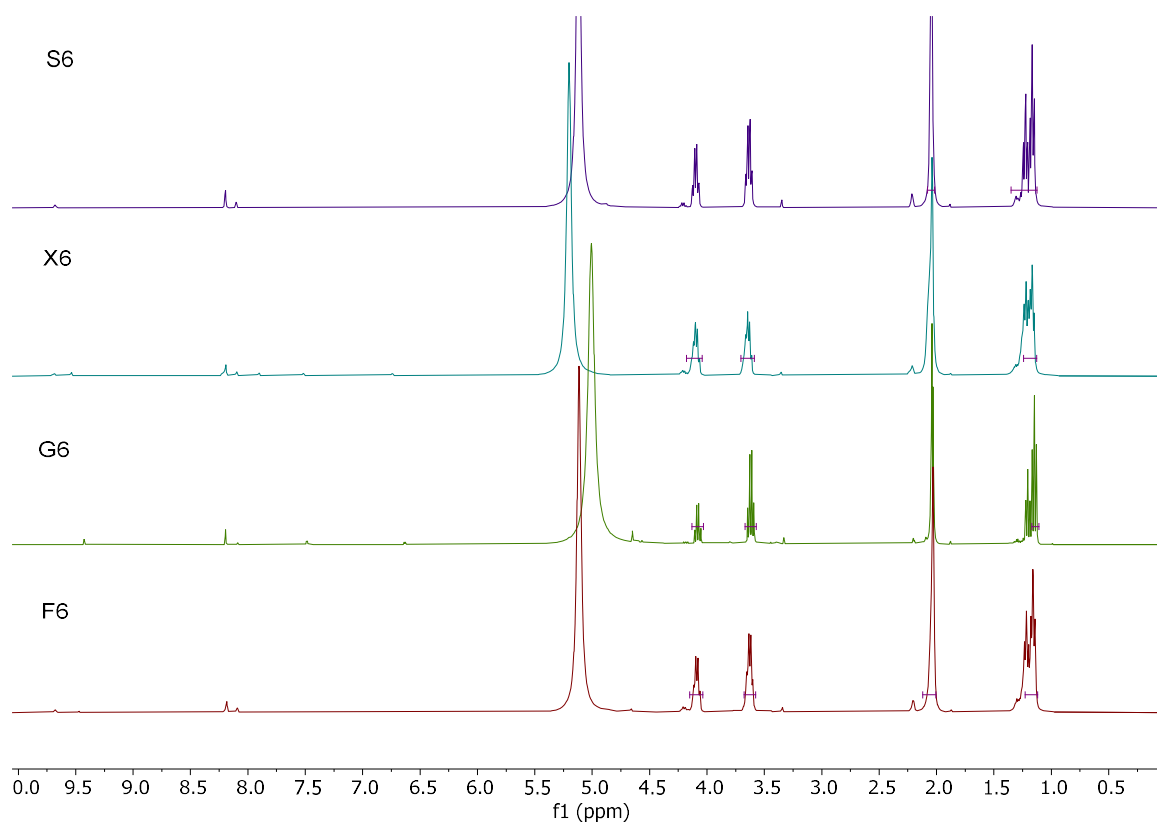

Figure S13:  $^1\text{H}$ -NMR spectra of humins synthesized in acetic acid and water/ethanol taken in  $\text{D}_2\text{O}$

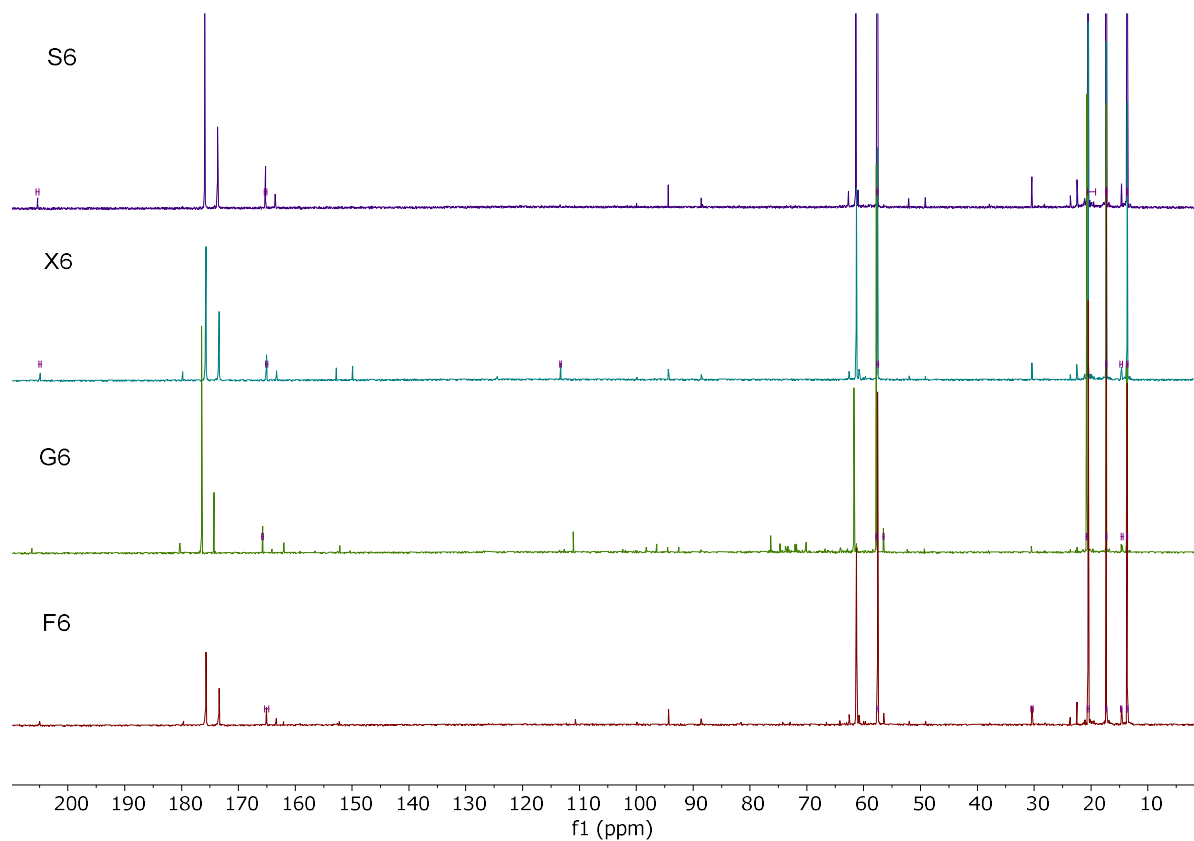

Figure S14:  $^{13}\text{C}$ -NMR spectra of humins synthesized in acetic acid and water/ethanol taken in  $\text{D}_2\text{O}$

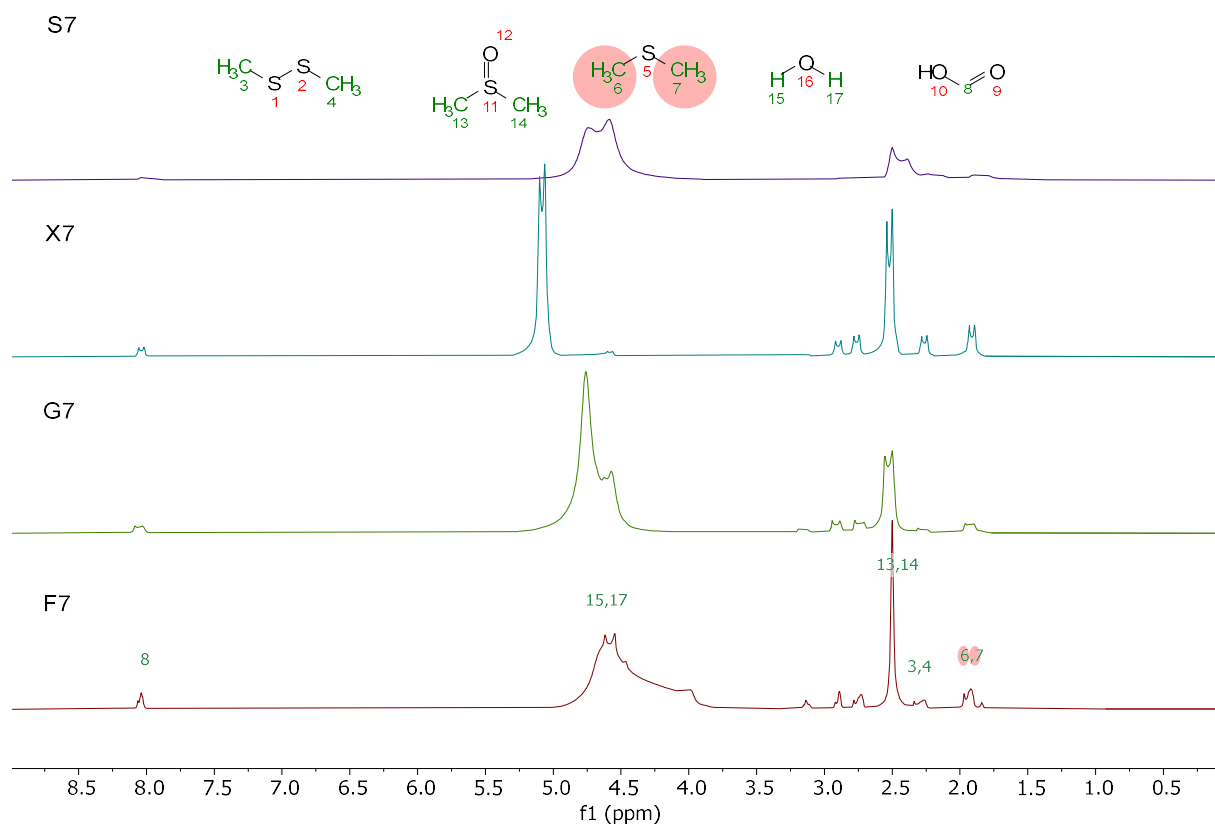

Figure S15:  $^1\text{H}$ -NMR spectra of humins synthesized in sulfuric acid and water/dimethyl sulfoxide taken in  $\text{DMSO}-d_6$

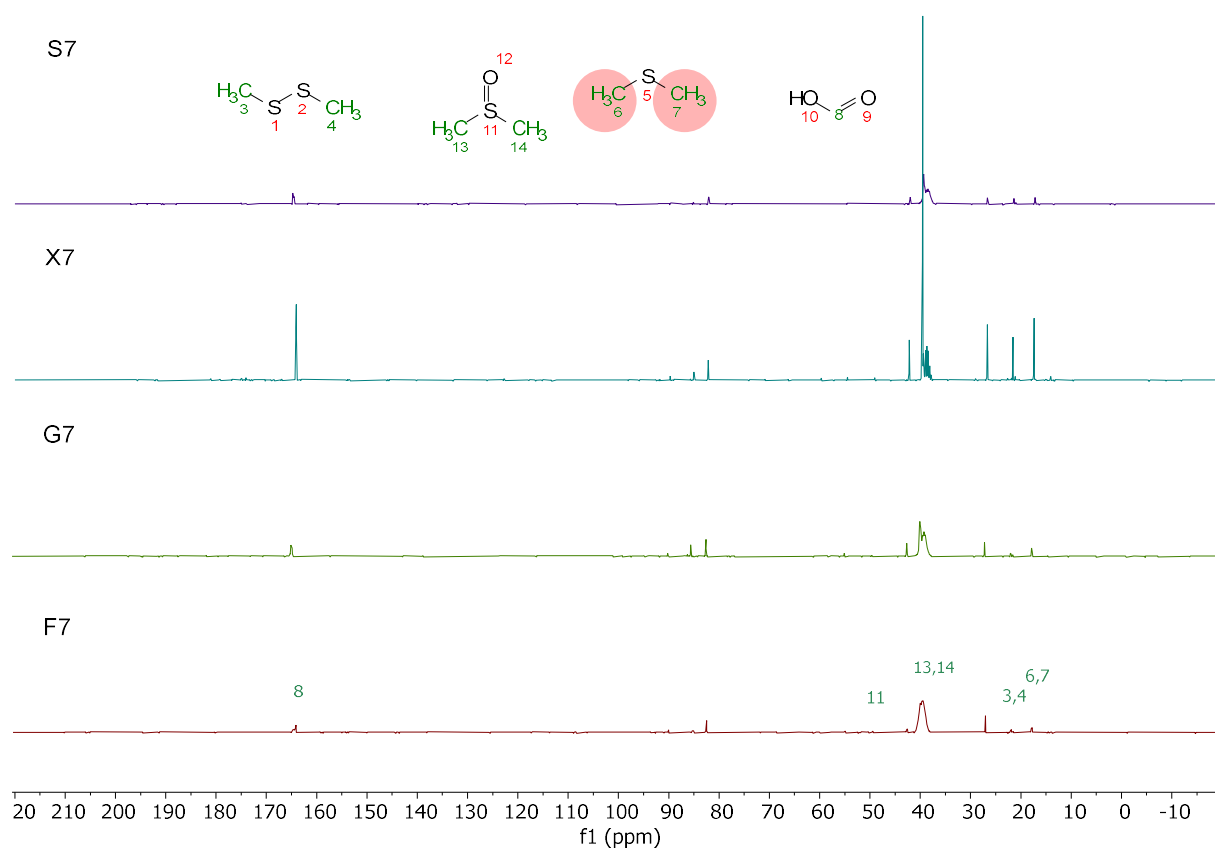



Figure S16:  $^{13}\text{C}$ -NMR spectra of humins synthesized in sulfuric acid and water/dimethyl sulfoxide taken in  $\text{DMSO-d}_6$

## Elemental analysis:

Table S1: Theoretical elemental compositions of sugars used for humin synthesis

| Elements | Fructose | Glucose | Xylose | Sucrose |
|----------|----------|---------|--------|---------|
| H        | 6,71     | 6,71    | 6,71   | 6,48    |
| C        | 40       | 40      | 40     | 42,11   |
| O        | 53,28    | 53,28   | 53,28  | 51,41   |
| H/C      | 2,01     | 2,01    | 2,01   | 1,85    |
| O/C      | 1,00     | 1,00    | 1,00   | 0,92    |

Table S2: CHSO of humin synthesized in sulfuric acid and water

| Elements | F1     | G1     | X1     | S1     |
|----------|--------|--------|--------|--------|
| H        | 3.875  | 4.105  | 4.01   | 4.12   |
| C        | 63.54  | 63.34  | 64.66  | 63.795 |
| O        | 31.3   | 31.245 | 30.425 | 31.625 |
| S        | 0      | 0      | 0      | 0      |
| Sum      | 98.715 | 98.69  | 99.095 | 99.54  |
| H/C      | 0.73   | 0.78   | 0.74   | 0.77   |
| H/O      | 0.37   | 0.37   | 0.35   | 0.37   |

Table S3: CHSO of fructose humins

| Elements | F1     | F2     | F3     | F4     | F5         | F6         | F7     |
|----------|--------|--------|--------|--------|------------|------------|--------|
| H        | 3.875  | 3.915  | 3.7    | 4.565  | 4.905      | 4.165      | 4.185  |
| C        | 63.54  | 62.595 | 62.985 | 65.175 | 67.26      | 61.7       | 58.69  |
| O        | 31.3   | 32.14  | 32.225 | 29.6   | 26.48      | 32.78      | 26.015 |
| S        | 0      | 0      | 0      | 0      | 0          | 0          | 9.76   |
| Sum      | 98.715 | 98.65  | 98.91  | 99.34  | 98.64<br>5 | 98.64<br>5 | 98.65  |
| H/C      | 0.73   | 0.75   | 0.70   | 0.84   | 0.88       | 0.81       | 0.86   |
| O/C      | 0.37   | 0.39   | 0.38   | 0.34   | 0.30       | 0.40       | 0.33   |

Table S4: CHSO of glucose humins

| Elements | G1    | G2    | G3    | G4    | G5    | G6    | G7    |
|----------|-------|-------|-------|-------|-------|-------|-------|
| H        | 4.11  | 4.00  | 3.95  | 4.83  | 5.17  | 3.88  | 4.12  |
| C        | 63.34 | 62.62 | 62.77 | 65.87 | 68.09 | 59.36 | 59.00 |
| O        | 31.25 | 32.23 | 32.40 | 28.34 | 25.66 | 34.38 | 26.85 |
| S        | 0.00  | 0.00  | 0.00  | 0.00  | 0.00  | 0.00  | 8.99  |
| Sum      | 98.69 | 98.84 | 99.11 | 99.04 | 98.91 | 97.61 | 98.95 |
| H/C      | 0.78  | 0.77  | 0.76  | 0.88  | 0.91  | 0.78  | 0.84  |

|            |      |      |      |      |      |      |      |
|------------|------|------|------|------|------|------|------|
| <b>O/C</b> | 0.37 | 0.39 | 0.39 | 0.32 | 0.28 | 0.43 | 0.34 |
|------------|------|------|------|------|------|------|------|

Table S5: CHSO of xylose humins

| Elements   | X1    | X2    | X3    | X4    | X5    | X6    | X7    |
|------------|-------|-------|-------|-------|-------|-------|-------|
| <b>H</b>   | 4.01  | 3.71  | 4.01  | 4.70  | 4.79  | 4.03  | 4.06  |
| <b>C</b>   | 64.66 | 63.87 | 63.92 | 66.51 | 68.29 | 61.42 | 58.92 |
| <b>O</b>   | 30.43 | 31.17 | 31.24 | 28.08 | 25.50 | 29.26 | 27.28 |
| <b>S</b>   | 0.00  | 0.00  | 0.00  | 0.00  | 0.00  | 0.00  | 8.42  |
| <b>Sum</b> | 99.10 | 98.75 | 99.16 | 99.28 | 98.57 | 98.91 | 98.66 |
| <b>H/C</b> | 0.74  | 0.70  | 0.75  | 0.85  | 0.84  | 0.79  | 0.83  |
| <b>O/C</b> | 0.35  | 0.37  | 0.37  | 0.32  | 0.28  | 0.36  | 0.35  |

Table S6: CHSO of sucrose humins

| Elements   | S1    | S2    | S3    | S4    | S5    | S6    | S7    |
|------------|-------|-------|-------|-------|-------|-------|-------|
| <b>H</b>   | 4.12  | 4.13  | 3.87  | 4.50  | 4.82  | 3.88  | 4.27  |
| <b>C</b>   | 63.80 | 63.47 | 62.98 | 64.77 | 67.03 | 59.31 | 61.19 |
| <b>O</b>   | 31.63 | 31.15 | 32.15 | 29.86 | 27.49 | 34.39 | 26.54 |
| <b>S</b>   | 0.00  | 0.00  | 0.00  | 0.00  | 0.00  | 0.00  | 6.64  |
| <b>Sum</b> | 99.54 | 98.74 | 98.99 | 99.13 | 99.34 | 97.58 | 98.63 |
| <b>H/C</b> | 0.77  | 0.78  | 0.74  | 0.83  | 0.86  | 0.79  | 0.84  |
| <b>O/C</b> | 0.37  | 0.37  | 0.38  | 0.35  | 0.31  | 0.43  | 0.33  |

## IR-spectra:

Table S7: Assignment of IR-bands

| Wavenumber [cm <sup>-1</sup> ] | Assignment                                                     |
|--------------------------------|----------------------------------------------------------------|
| <b>750+795</b>                 | C-H Out of plane vibration substituted furan ring              |
| <b>965</b>                     | C-H vibration furan ring                                       |
| <b>1020</b>                    | C=C stretch vibration                                          |
| <b>1090</b>                    | C-O-C ether vibration                                          |
| <b>1160+1200</b>               | C-O-C deformation vibration furan ring                         |
| <b>1295</b>                    | C-H rocking vibration                                          |
| <b>1360</b>                    | C-C framework vibration (furan) C6 sugars                      |
| <b>1395</b>                    | C-C framework vibration (furan) C5 sugars                      |
| <b>1420</b>                    | C=S stretch                                                    |
| <b>1460</b>                    | C-H aliphatic chain vibration                                  |
| <b>1510</b>                    | C=C vibration aromatic double bonds of poly substituted furans |
| <b>1600</b>                    | C=C stretch vibration conjugated with carbonyl                 |
| <b>1670</b>                    | C=O carbyonyl, aldehyde vibrations                             |
| <b>1700</b>                    | C=O stretch of acids, aldehydes and ketons                     |
| <b>1775</b>                    | C-S Thioester                                                  |

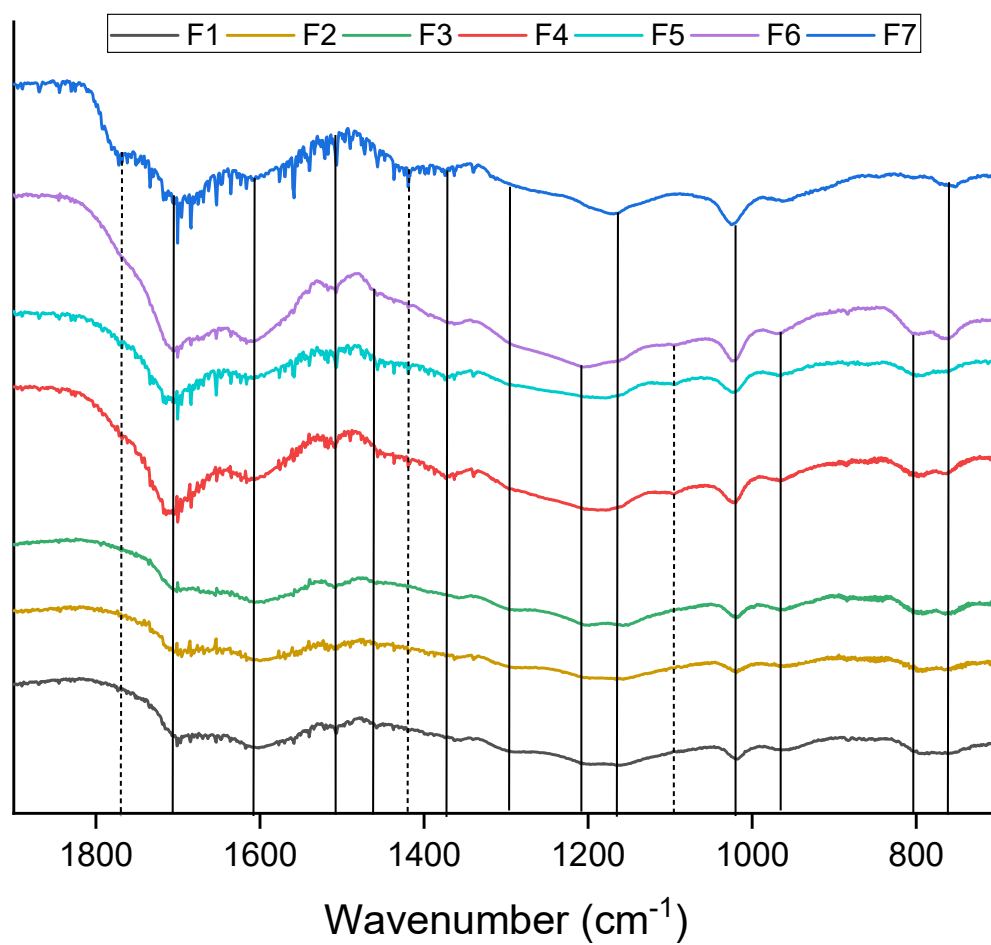

Figure S17: IR spectra of fructose humins

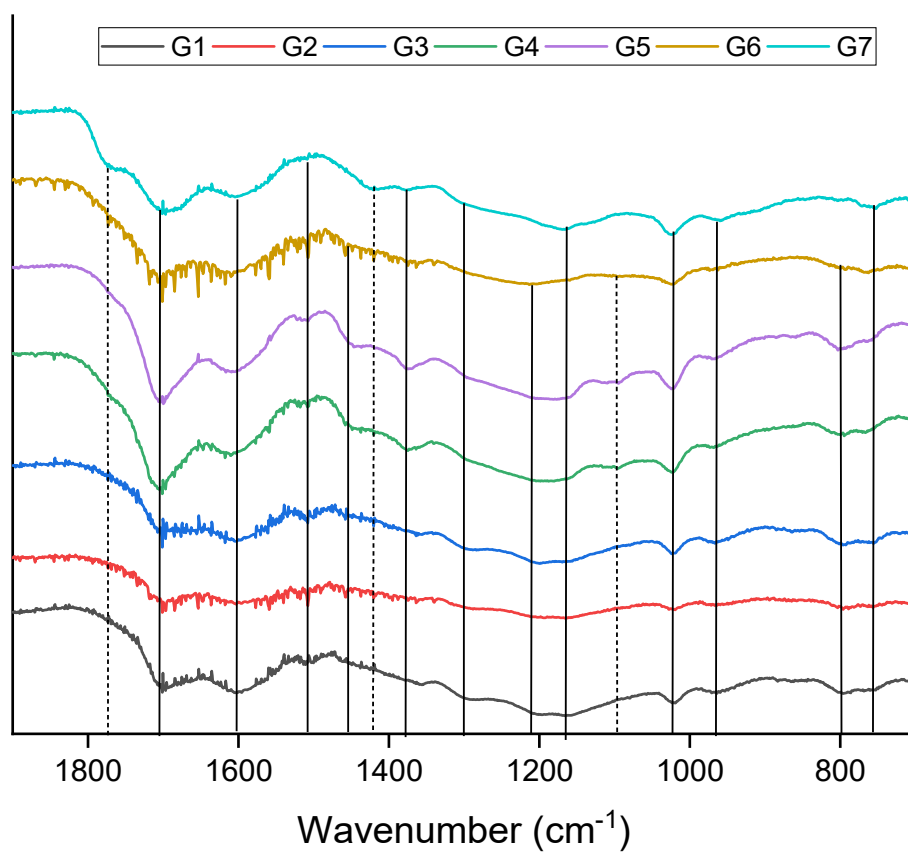

Figure S18: IR spectra of glucose humins

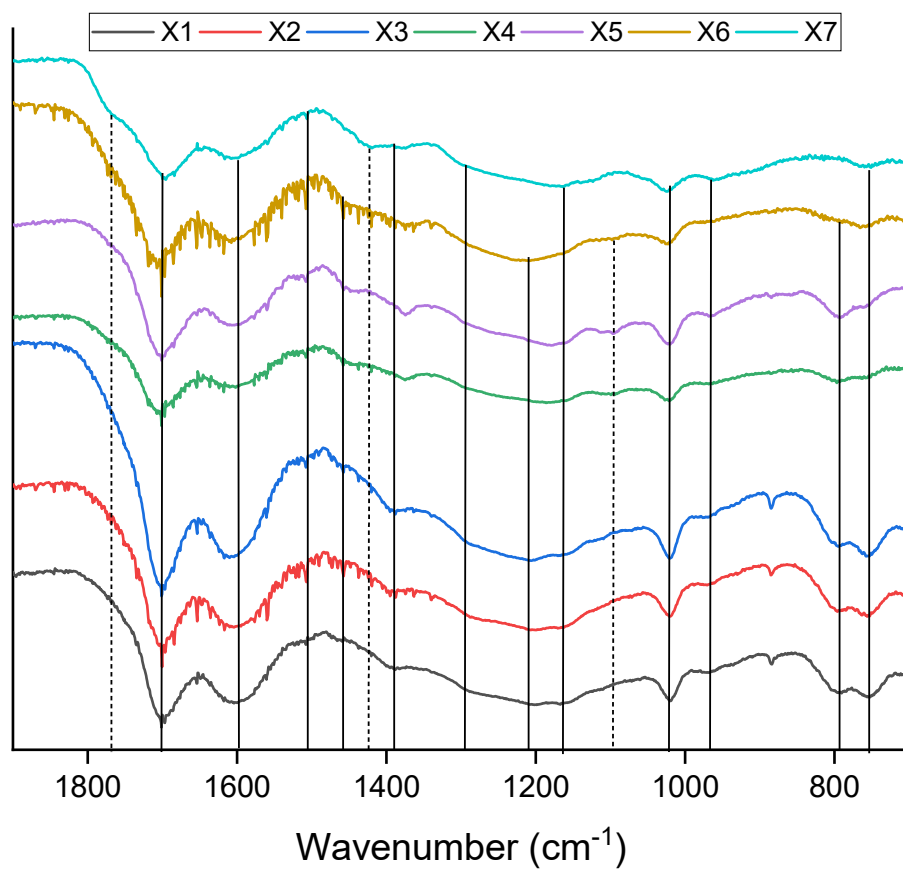

Figure S19: IR spectra of xylose humins

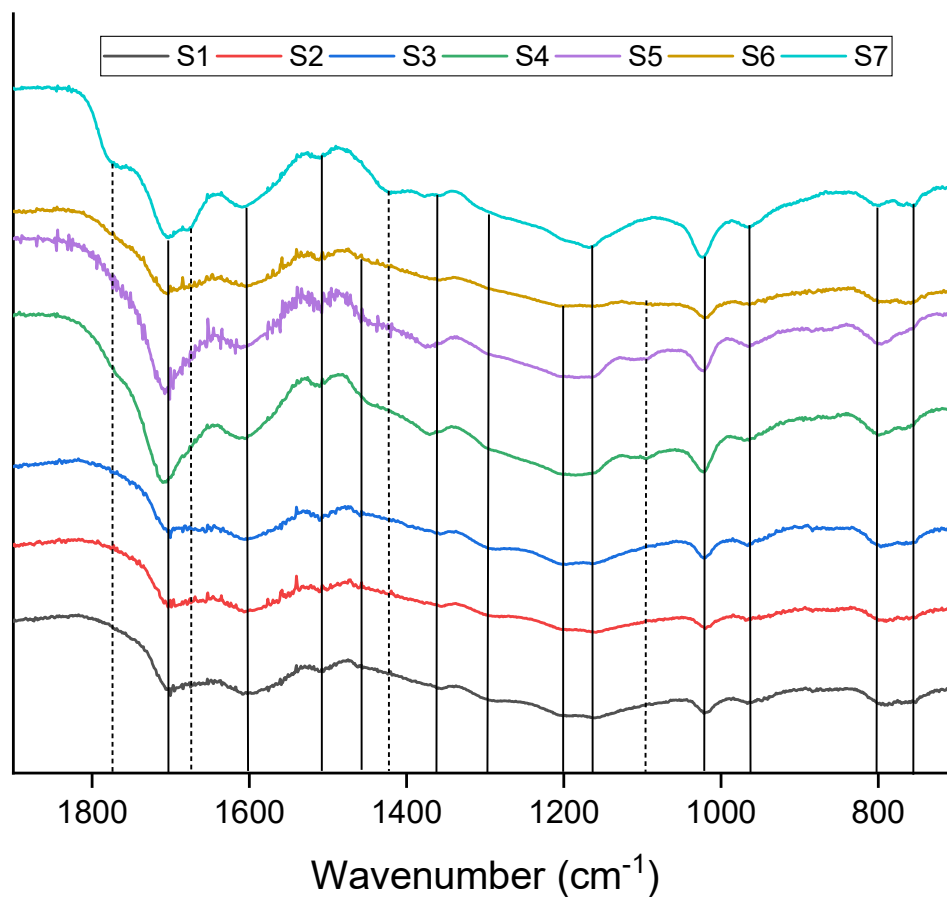

Figure S20: IR spectra of sucrose humins

**MALDI-TOF MS spectra:**

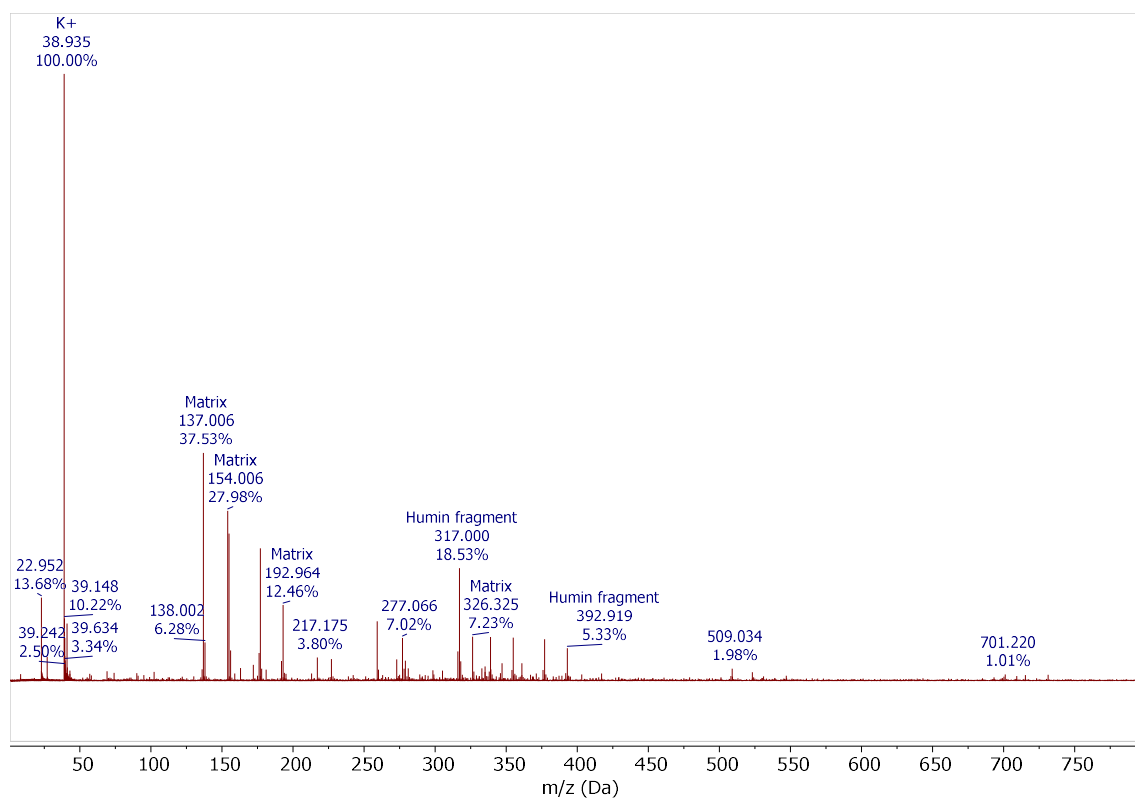

Figure S21: MALDI-TOF-MS spectrum of F1

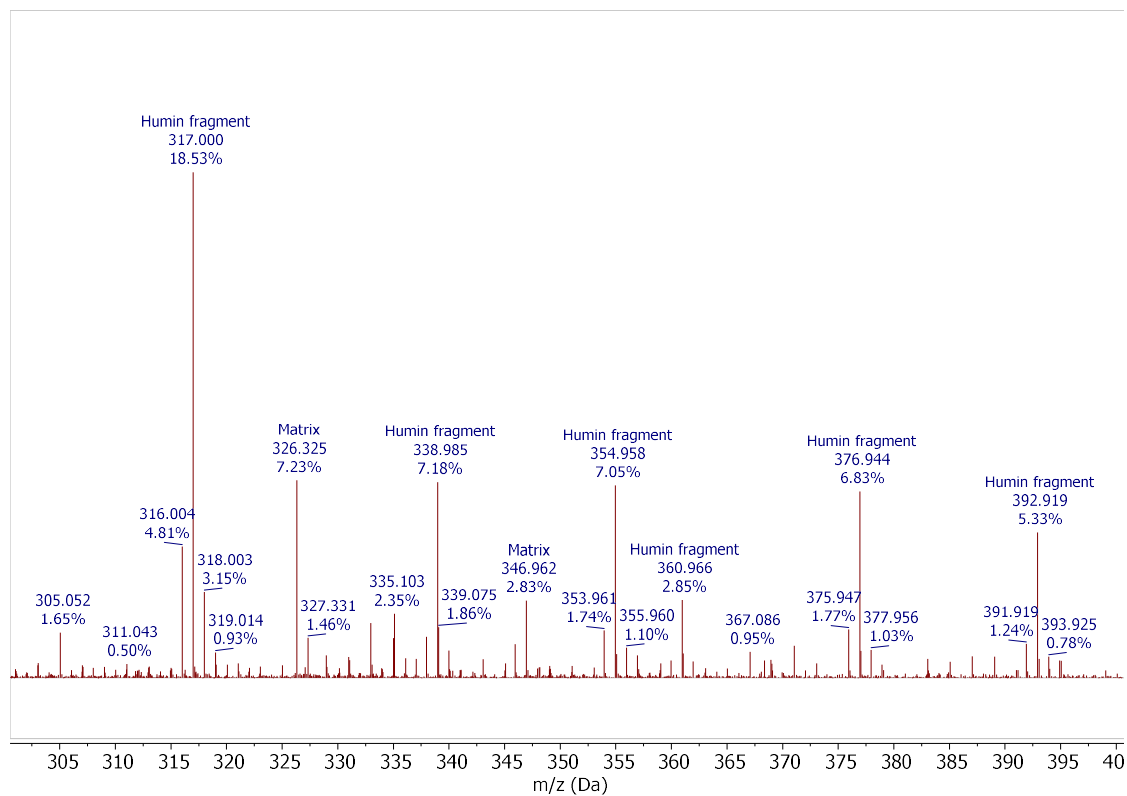

Figure S22: MALDI-TOF-MS spectrum of F1 zoomed in

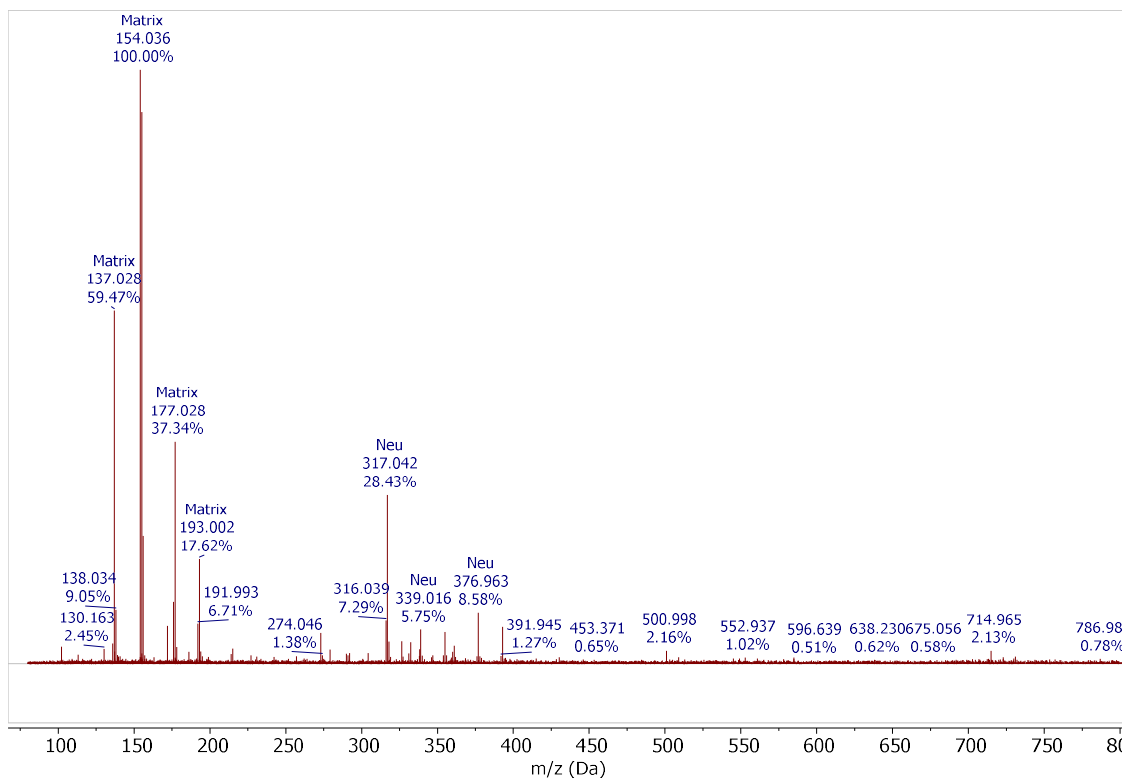

Figure S23: MALDI-TOF-MS spectrum of F2

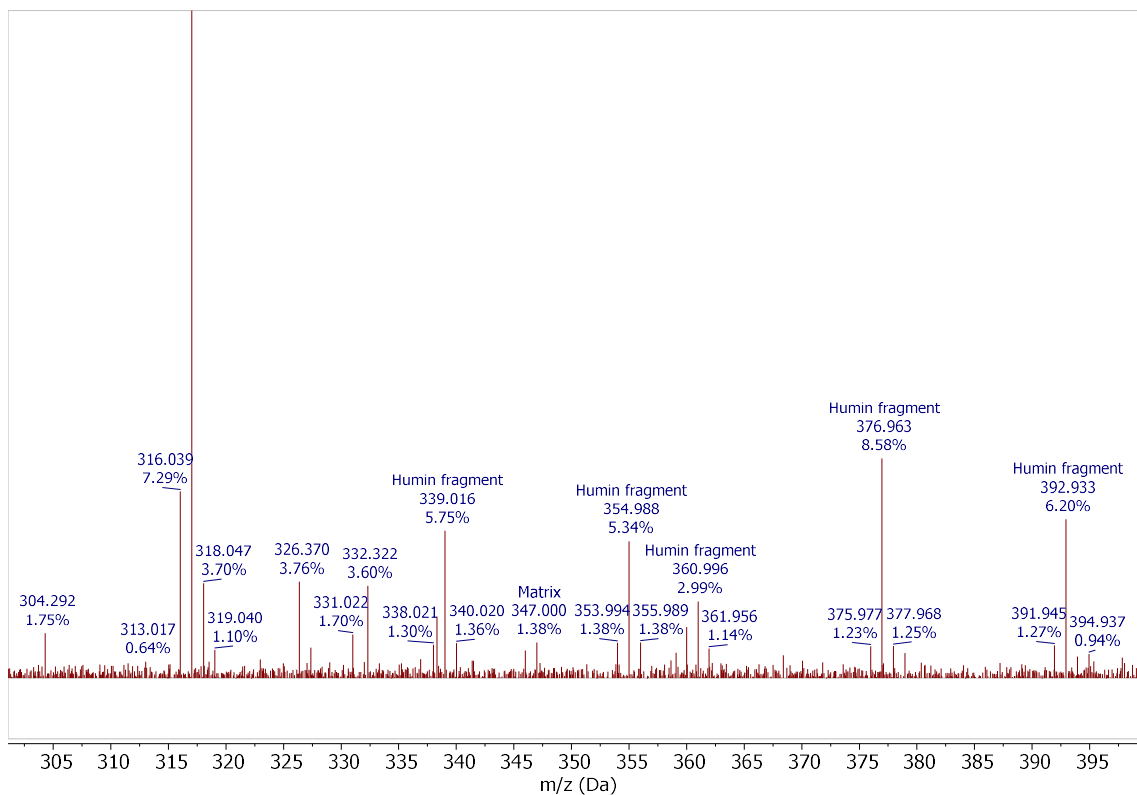

Figure S24: MALDI-TOF-MS spectrum of F2 zoomed in

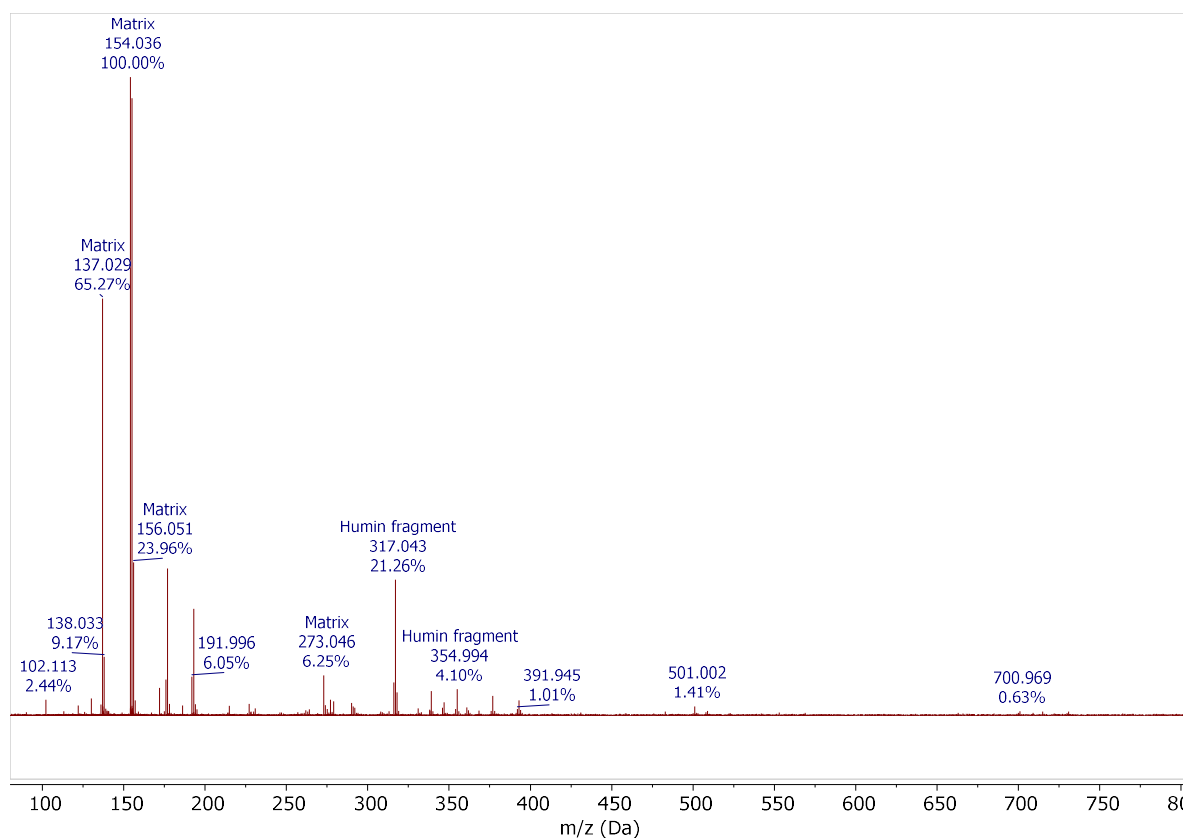

Figure S25: MALDI-TOF-MS spectrum of F3

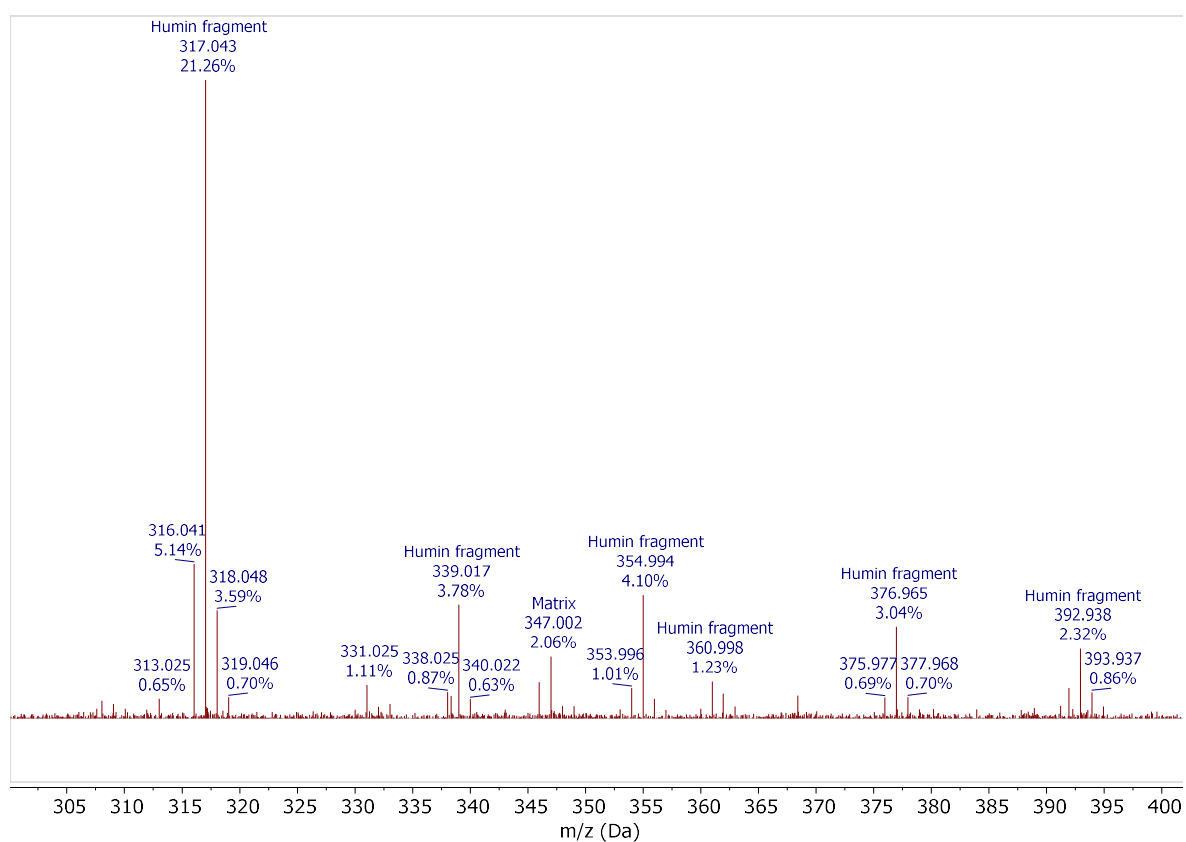

Figure S26: MALDI-TOF-MS spectrum of F3 zoomed in



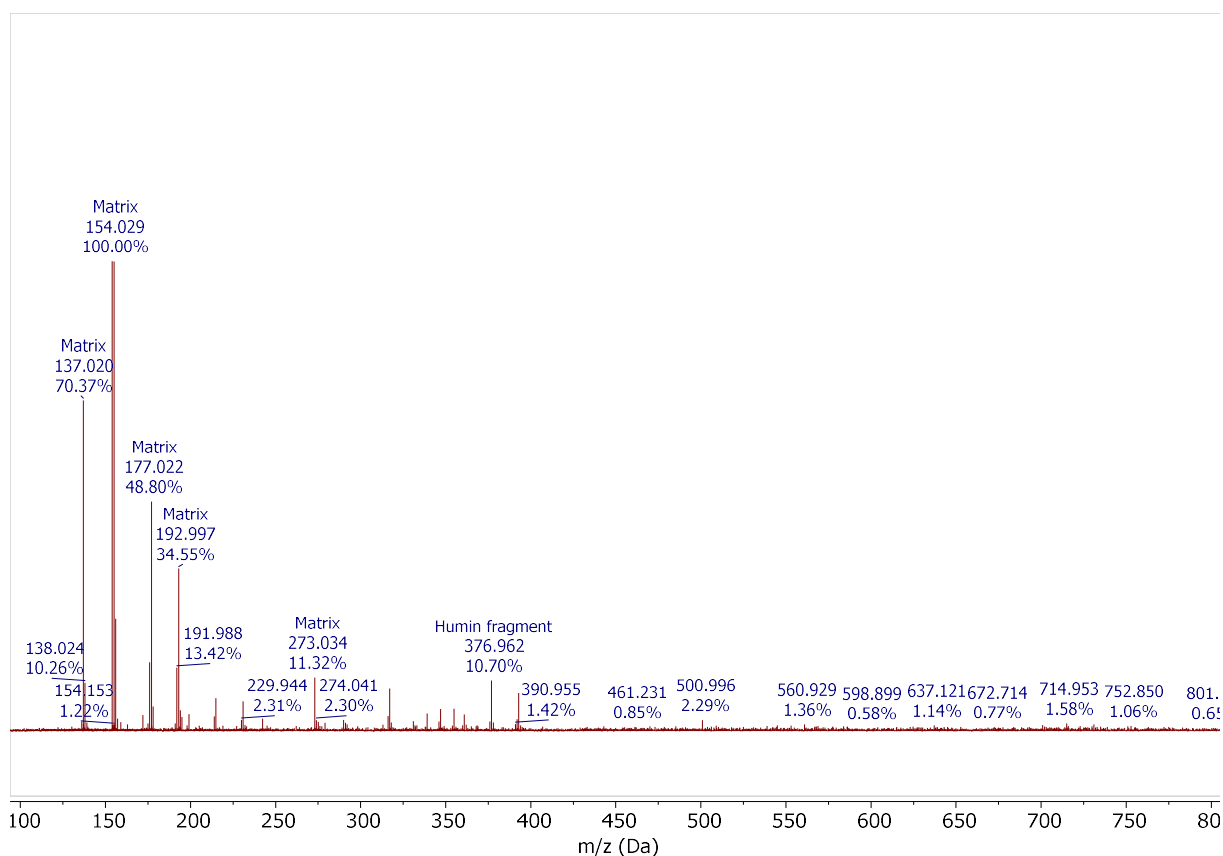

Figure 27: MALDI-TOF-MS spectrum of G1

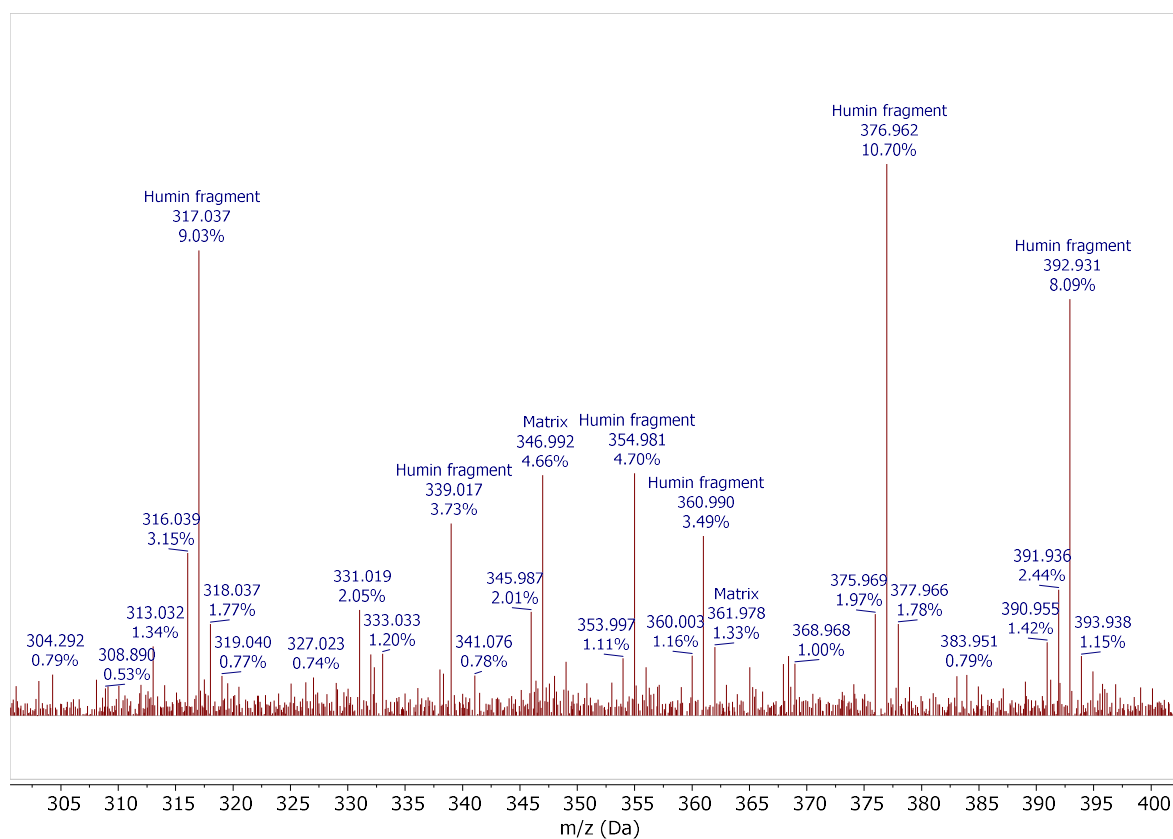

Figure S28: MALDI-TOF-MS spectrum of G1 zoomed in

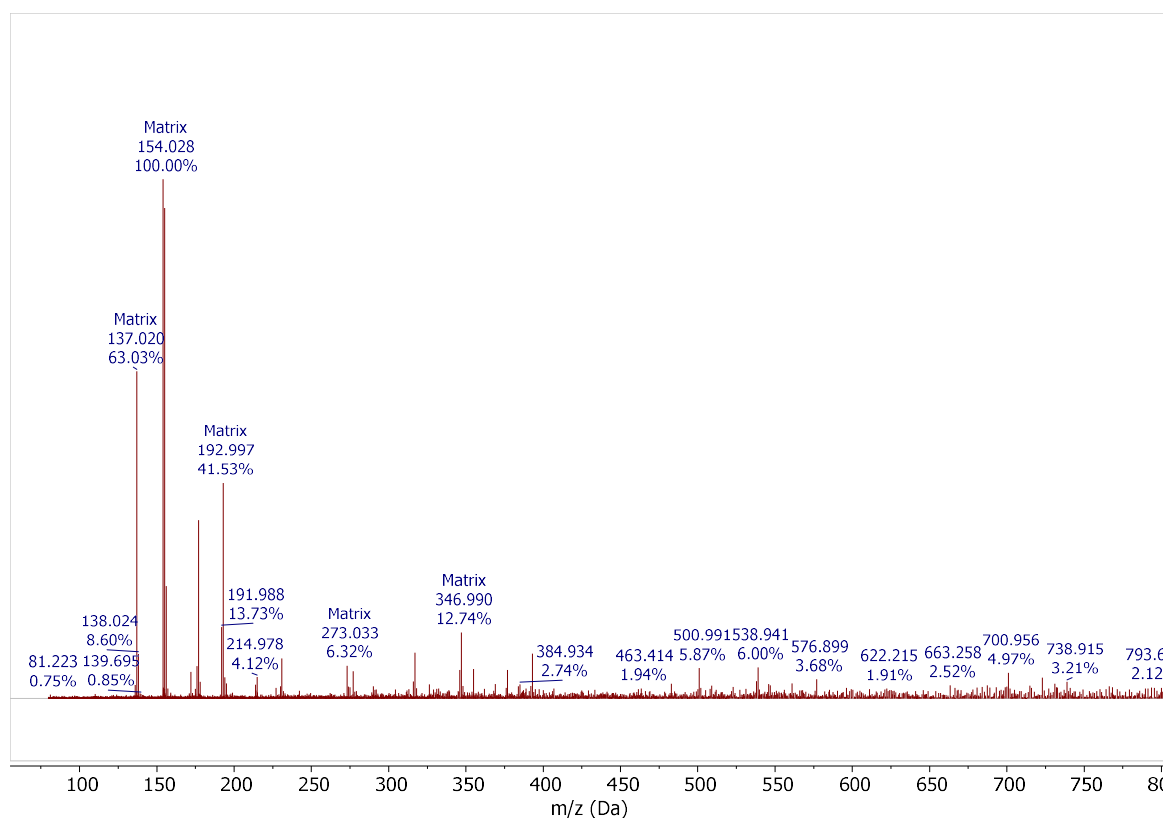

Figure S29: MALDI-TOF-MS spectrum of X1

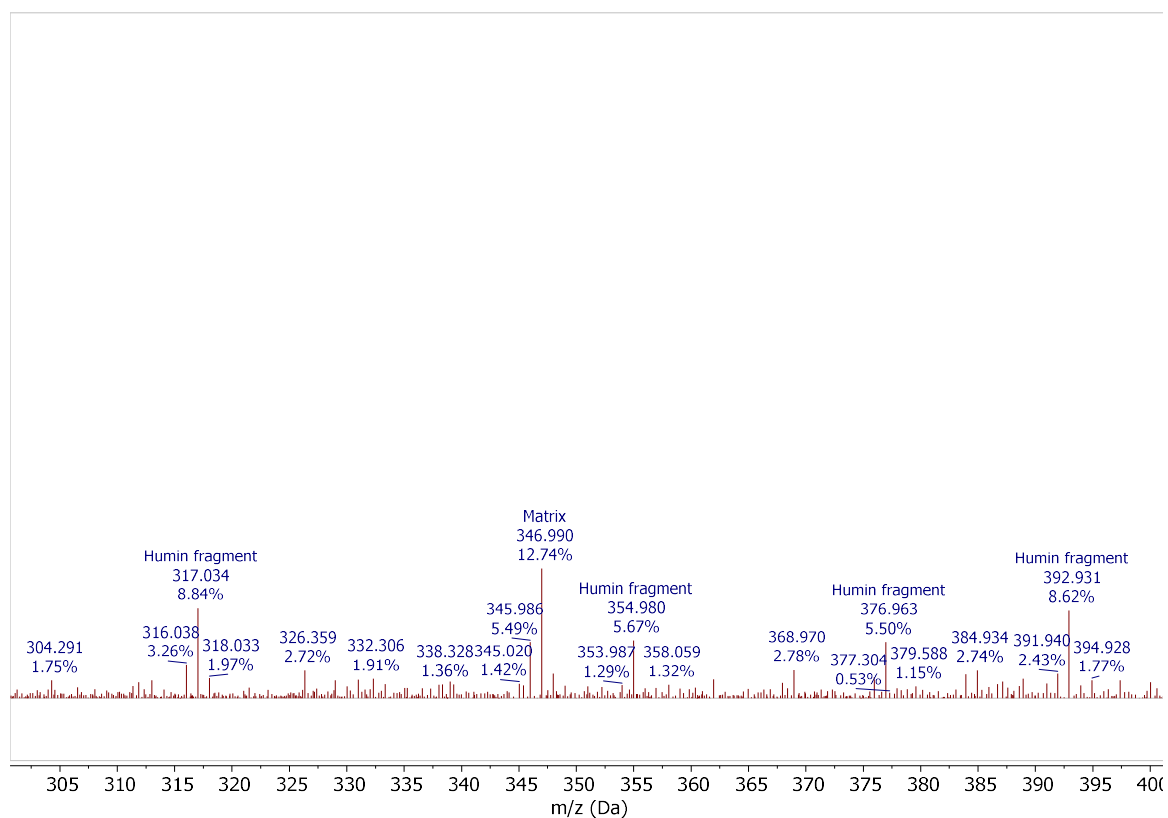

Figure S30: MALDI-TOF-MS spectrum of X1 zoomed in

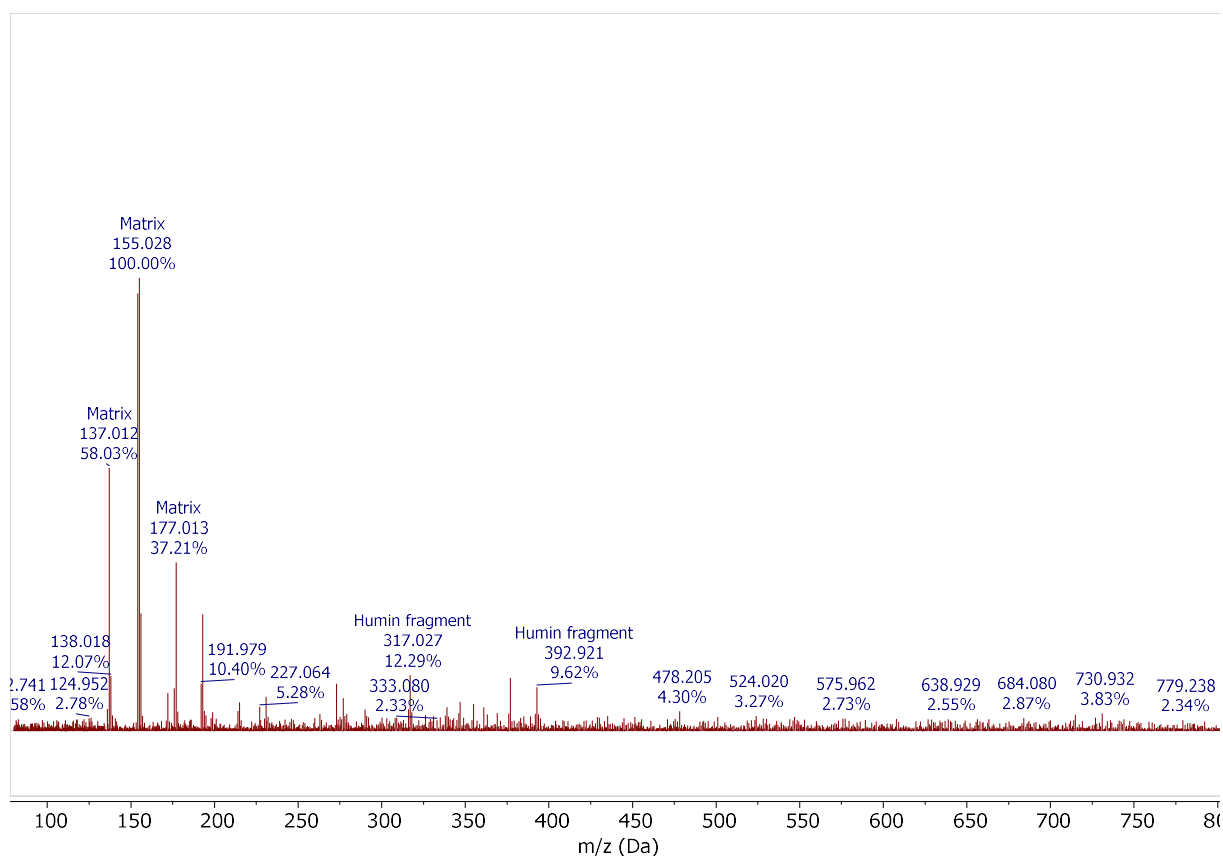

Figure S31: MALDI-TOF-MS spectrum of S1

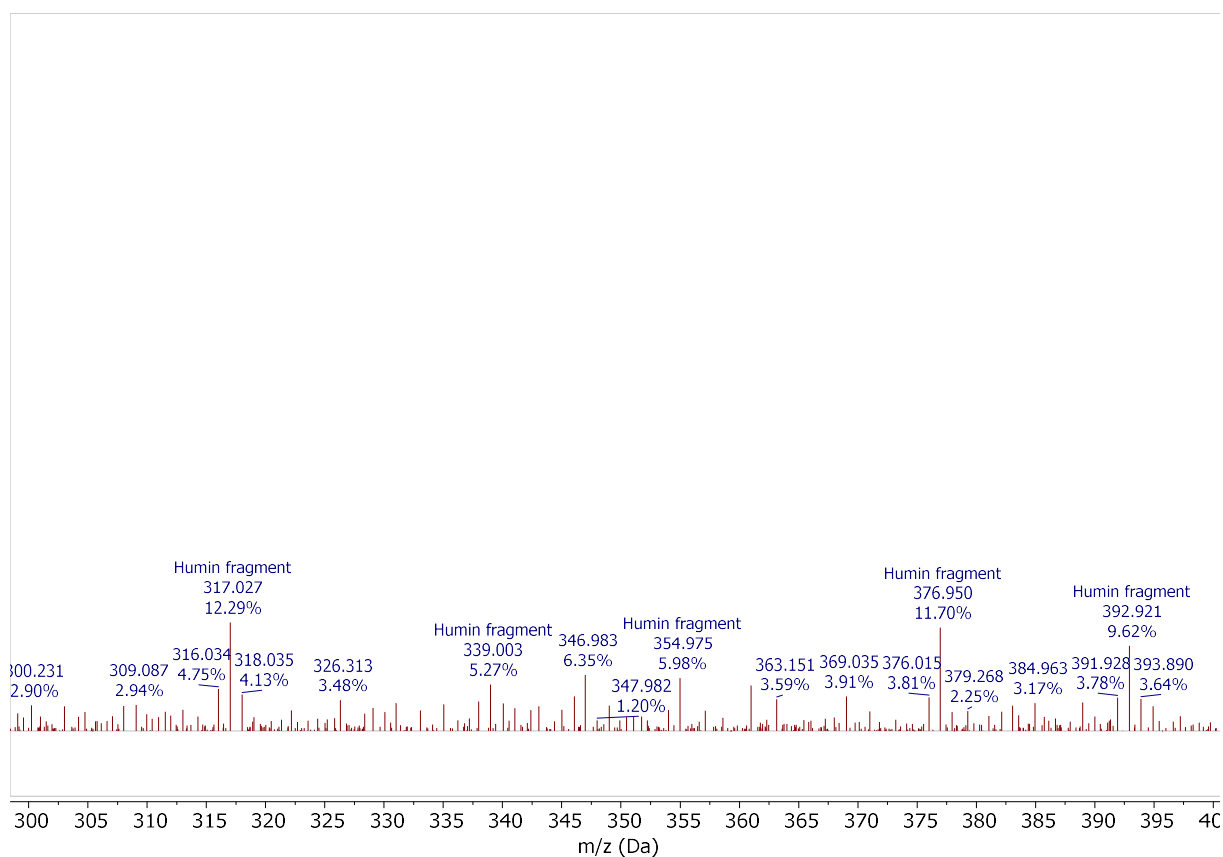

Figure S32: MALDI-TOF-MS spectrum of S1 zoomed in

Electron microscopy

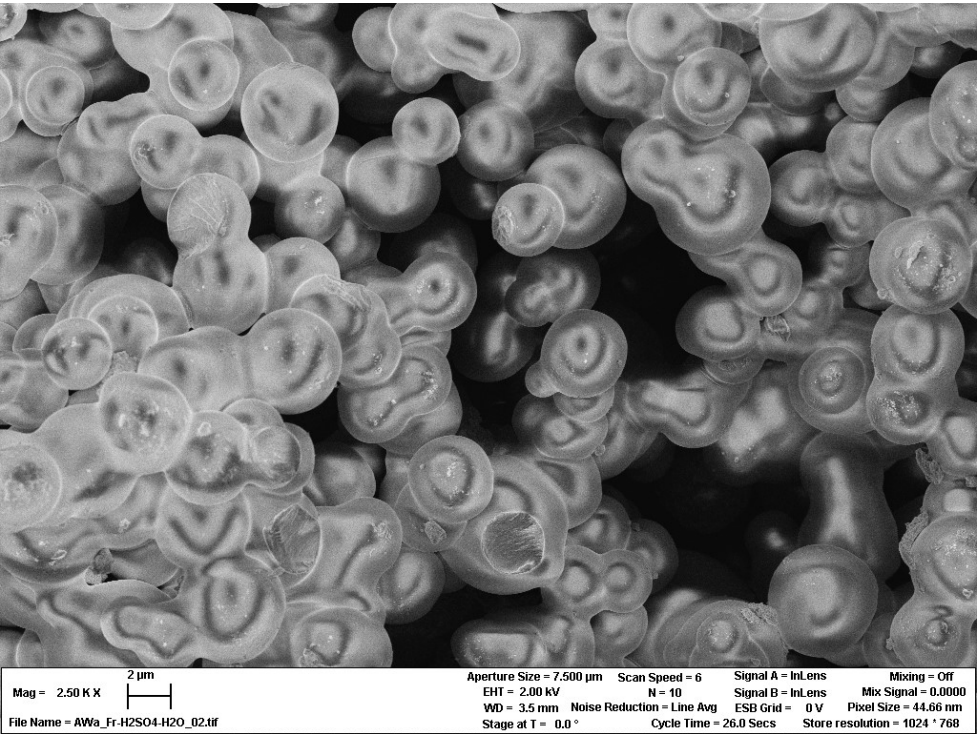

Figure S33: SEM micrograph of F1 zoomed in

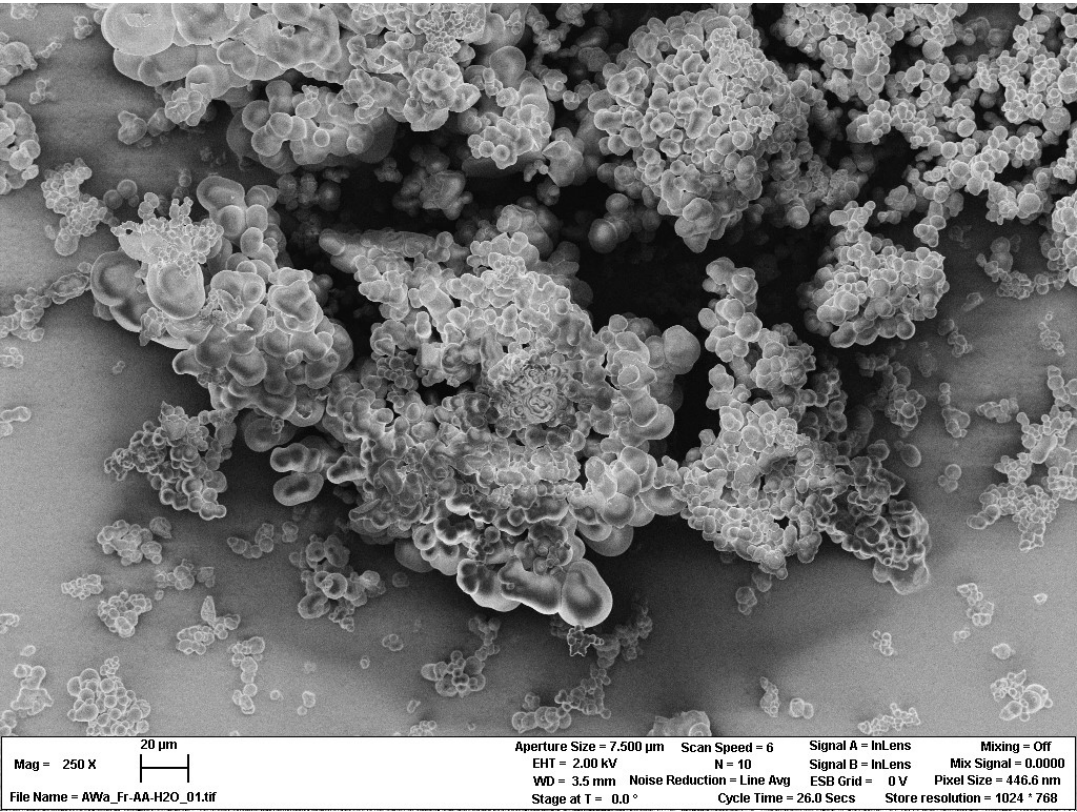

Figure S34: SEM micrograph of F2

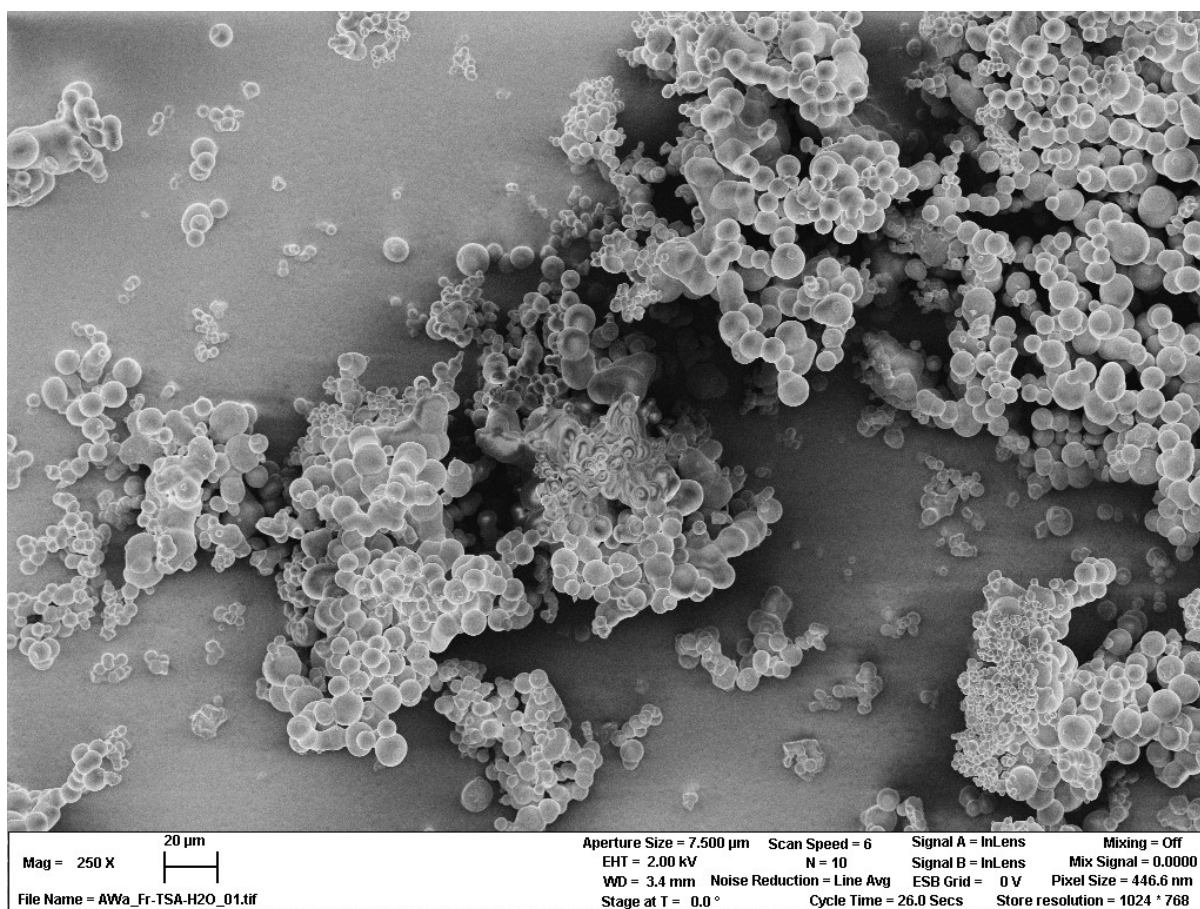

Figure S35: SEM micrograph of F3

## Humin conversion

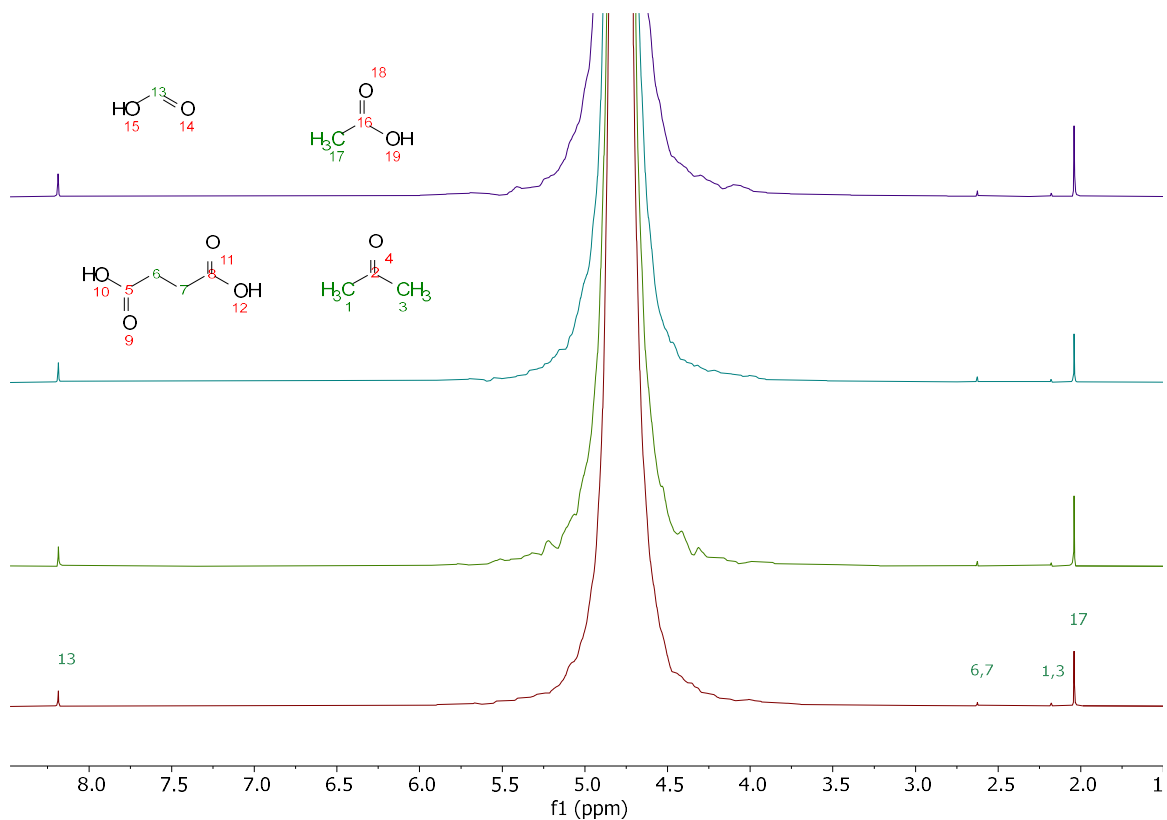

Figure S36:  $^1\text{H}$ -NMR of the reaction solutions of F1, G1, X1 and S1 after conversion

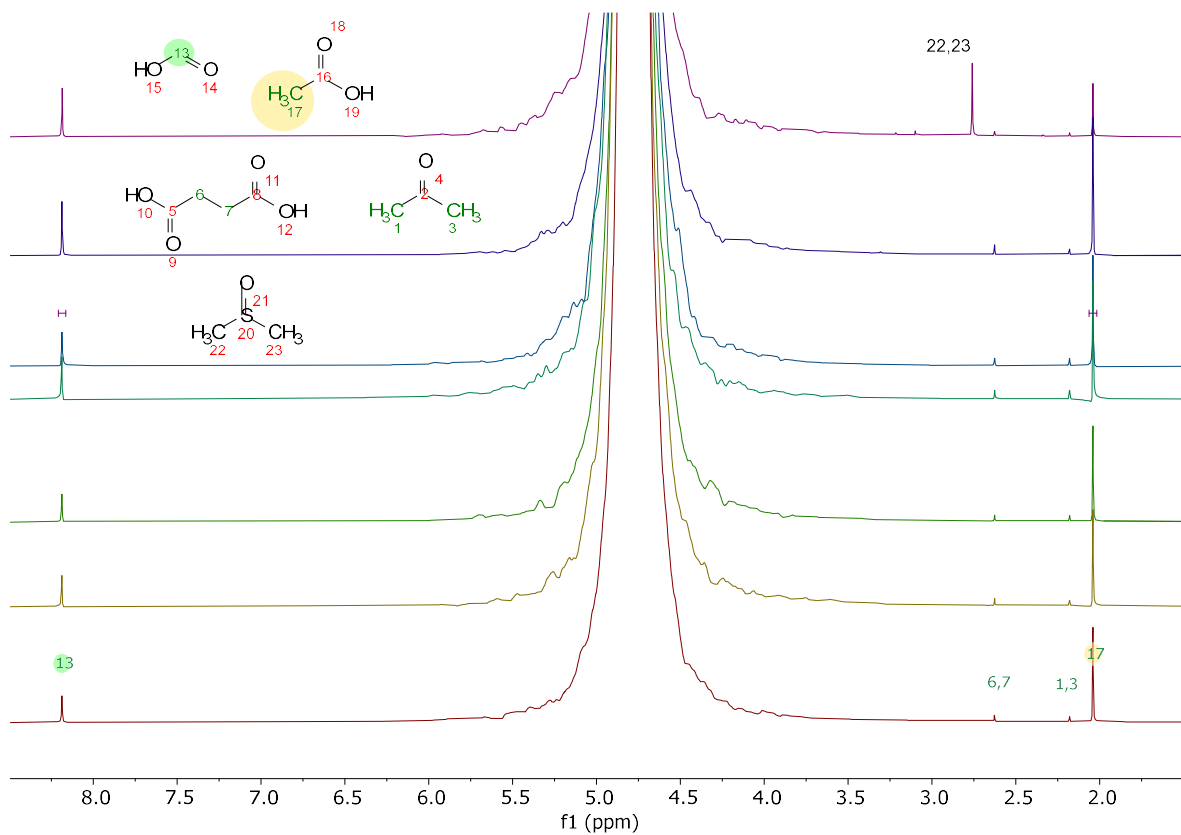

Figure S37:  $^1\text{H}$ -NMR of the reaction solutions of the fructose humins after conversion

## HPLC Analysis

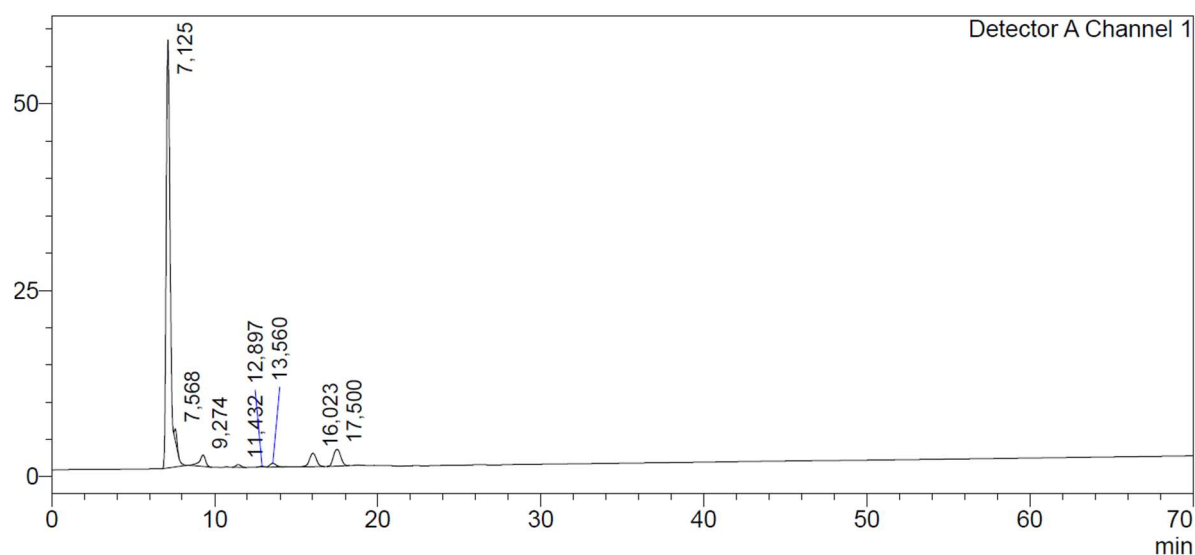

Figure S38: Chromatogram of F1

Table S8: HPLC data of reactions solutions after conversion

|    | Concentration [mM] |             |             |
|----|--------------------|-------------|-------------|
|    | Succinic Acid      | Formic Acid | Acetic Acid |
| F1 | 1                  | 19          | 15          |
| F2 | 1                  | 18          | 14          |
| F3 | 1                  | 20          | 14          |
| F4 | 1                  | 34          | 22          |
| F5 | 1                  | 37          | 24          |
| F6 | 1                  | 30          | 19          |
| F7 | 1                  | 30          | 8           |
| G1 | 1                  | 22          | 18          |
| X1 | 1                  | 21          | 12          |
| S1 | 1                  | 24          | 17          |

## Elemental Analysis

Table S9: Product yields and conversion of humins after catalyzed oxidation

|                 | F1    | F2    | F3    | F4    | F5    | F6    | F7    | G1    | X1    | S1    |
|-----------------|-------|-------|-------|-------|-------|-------|-------|-------|-------|-------|
| Succinic acid   | 0.007 | 0.008 | 0.008 | 0.008 | 0.007 | 0.008 | 0.008 | 0.008 | 0.008 | 0.008 |
| Formic acid     | 0.036 | 0.040 | 0.034 | 0.065 | 0.055 | 0.074 | 0.063 | 0.043 | 0.040 | 0.046 |
| Acetic acid     | 0.056 | 0.055 | 0.053 | 0.091 | 0.069 | 0.095 | 0.033 | 0.069 | 0.045 | 0.065 |
| DMSO            | 0.000 | 0.000 | 0.000 | 0.000 | 0.000 | 0.000 | 0.043 | 0.000 | 0.000 | 0.000 |
| CO <sub>2</sub> | 0.388 | 0.349 | 0.445 | 0.382 | 0.313 | 0.464 | 0.158 | 0.459 | 0.355 | 0.469 |
| CO              | 0.000 | 0.000 | 0.004 | 0.012 | 0.014 | 0.009 | 0.003 | 0.006 | 0.006 | 0.009 |
| Solid residue   | 0.512 | 0.548 | 0.457 | 0.442 | 0.542 | 0.351 | 0.691 | 0.415 | 0.546 | 0.395 |
| Combined Yield  | 0.488 | 0.452 | 0.543 | 0.558 | 0.458 | 0.649 | 0.309 | 0.585 | 0.454 | 0.605 |

Table S10: CHSO of humins synthesized in sulfuric acid and water after catalyzed oxidation

| Elements | F1    | G1    | X1     | S1     |
|----------|-------|-------|--------|--------|
| H        | 4,17  | 4,1   | 4,18   | 4,135  |
| C        | 57,63 | 55,59 | 58,625 | 56,61  |
| O        | 38,2  | 38,29 | 34,245 | 38,245 |
| S        | 0     | 0     | 0      | 0      |
| Sum      | 100   | 97,98 | 97,05  | 98,99  |
| H/C      | 0,87  | 0,89  | 0,86   | 0,88   |
| O/C      | 0,50  | 0,52  | 0,44   | 0,51   |

Table S11: CHSO of fructose humins after catalyzed oxidation

| Elements | F1    | F2    | F3     | F4     | F5     | F6     | F7     |
|----------|-------|-------|--------|--------|--------|--------|--------|
| H        | 4,17  | 4,02  | 3,66   | 4,1    | 4,835  | 3,985  | 3,915  |
| C        | 57,63 | 55,58 | 55,735 | 56,65  | 62,79  | 52,175 | 54,055 |
| O        | 38,2  | 37,25 | 38,16  | 36,285 | 30,66  | 39,89  | 33,665 |
| S        | 0     | 0     | 0      | 0      | 0      | 0      | 5,59   |
| Sum      | 100   | 96,85 | 97,555 | 97,035 | 98,285 | 96,05  | 97,225 |
| H/C      | 0,87  | 0,87  | 0,79   | 0,87   | 0,92   | 0,92   | 0,87   |
| O/C      | 0,50  | 0,50  | 0,51   | 0,48   | 0,37   | 0,57   | 0,47   |

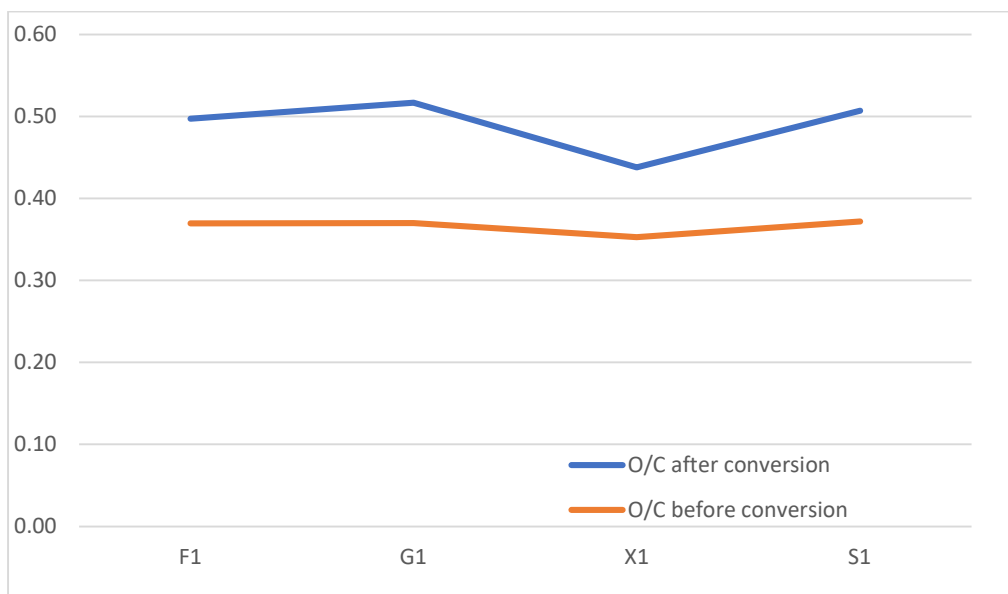

Figure S39: Comparison of O/C ratios before and after catalytic oxidation of humin synthesized in sulfuric acid and water



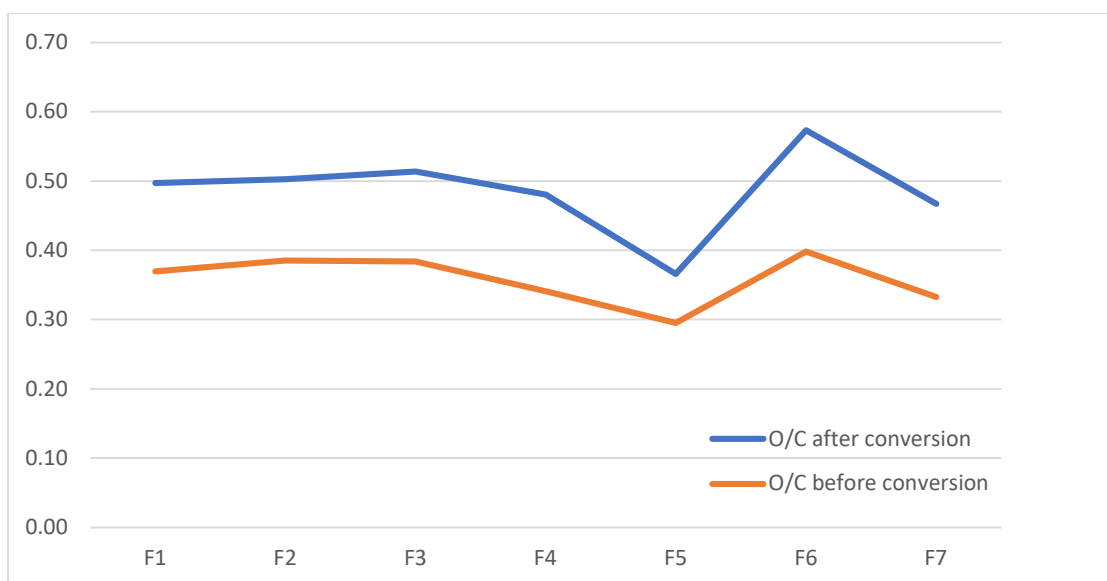

Figure S40: Comparison of O/C ratios before and after catalytic oxidation of fructose humins

## IR spectra

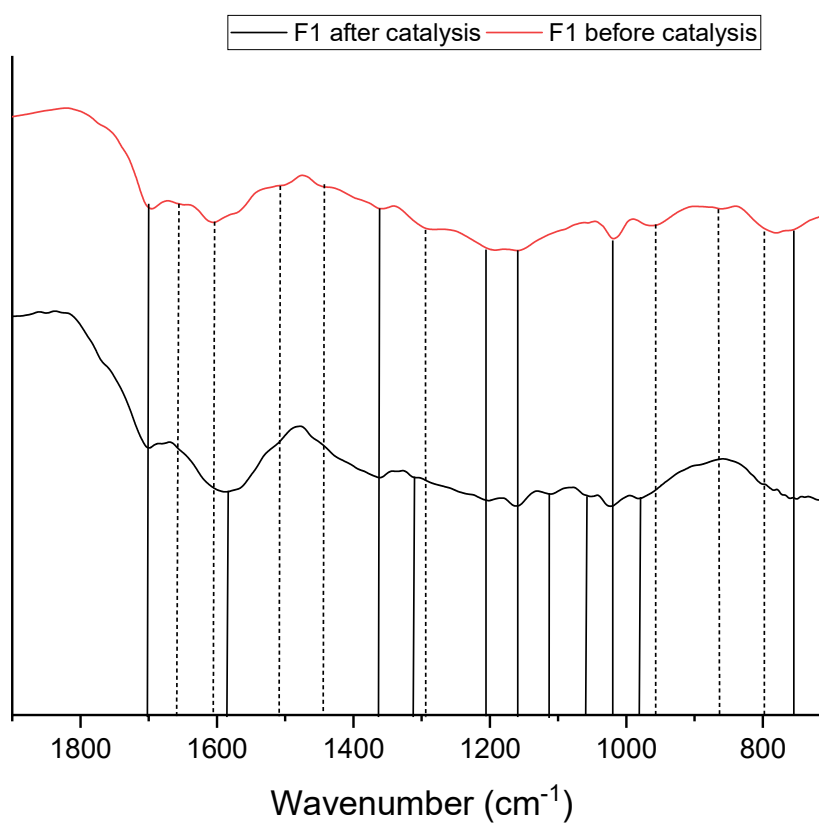

Figure S41: IR-spectrum of F1 before and after the catalysis

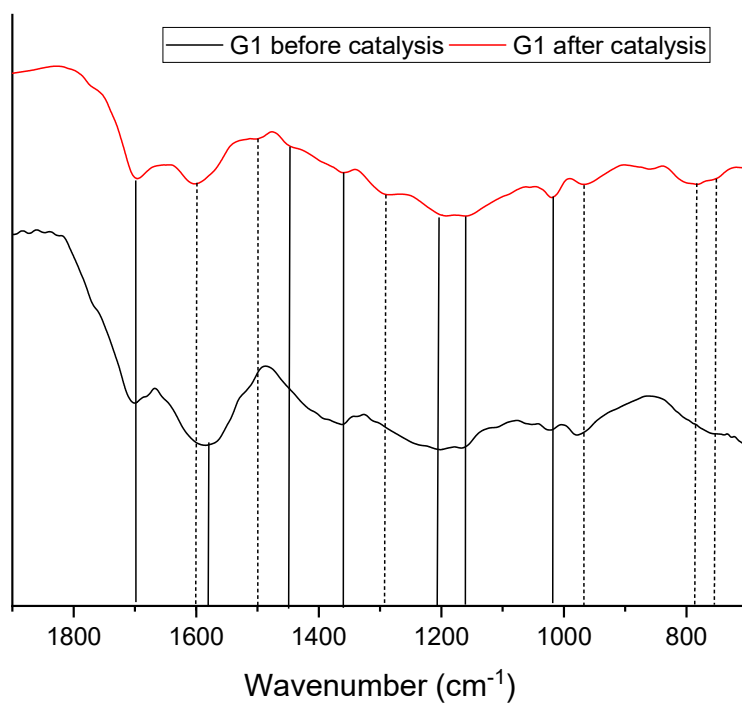

Figure S42: IR-spectrum of G1 before and after the catalysis

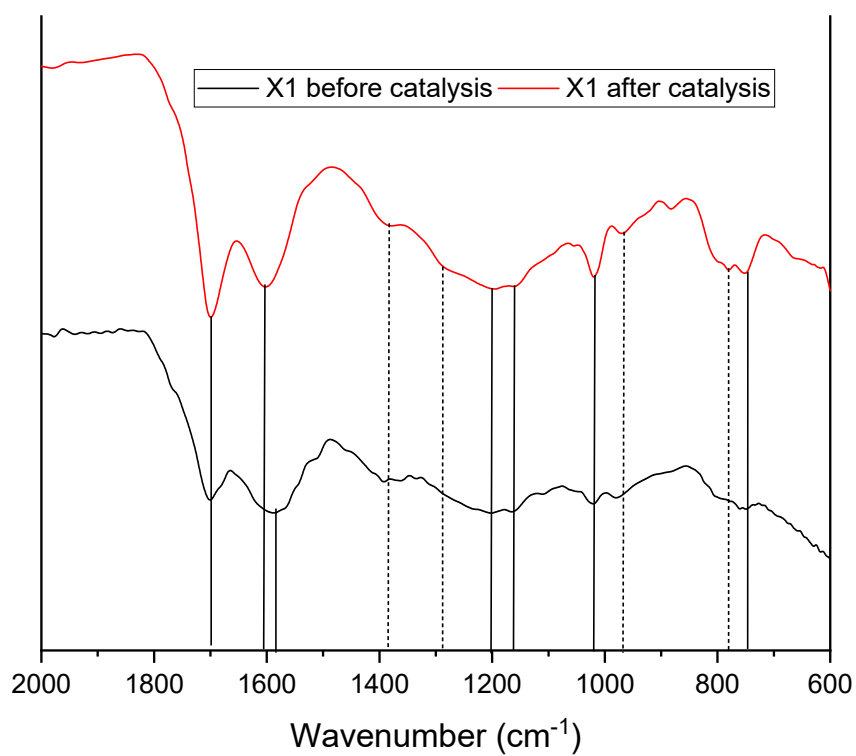

Figure S43: IR-spectrum of X1 before and after the catalysis

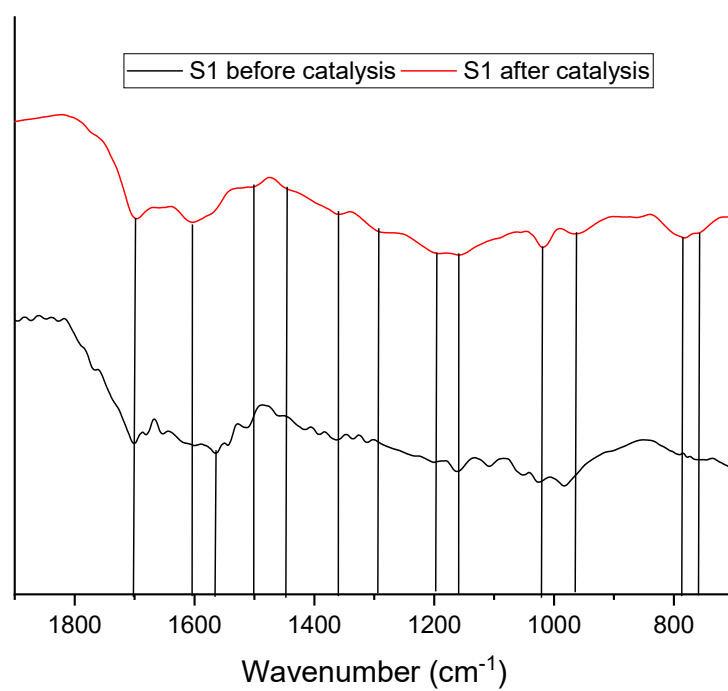

Figure S44: IR-spectrum of S1 before and after the catalysis

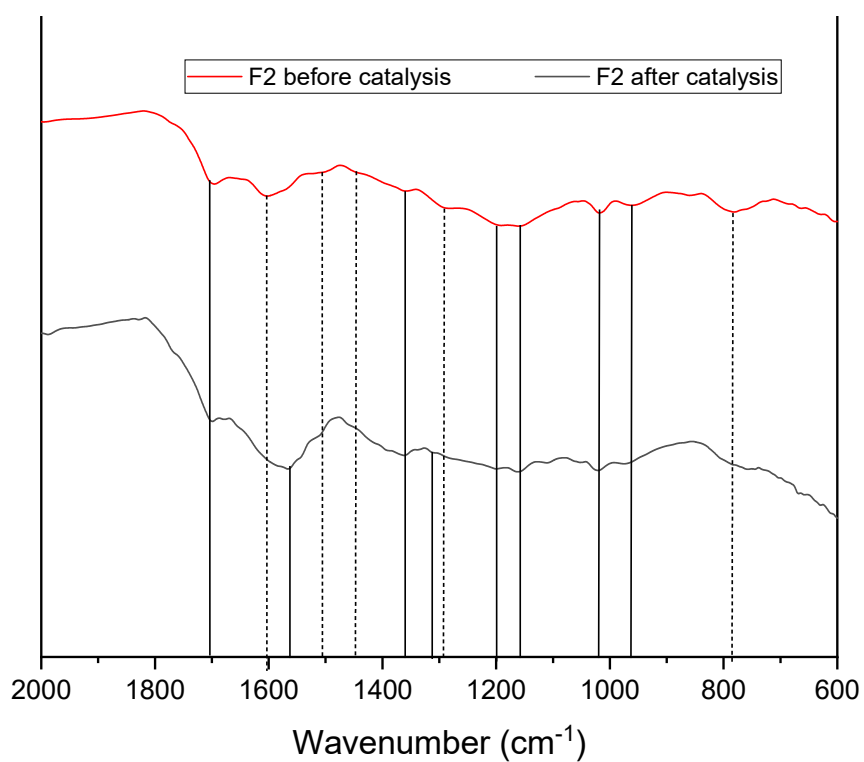

Figure S45: IR-spectrum of F2 before and after the catalysis

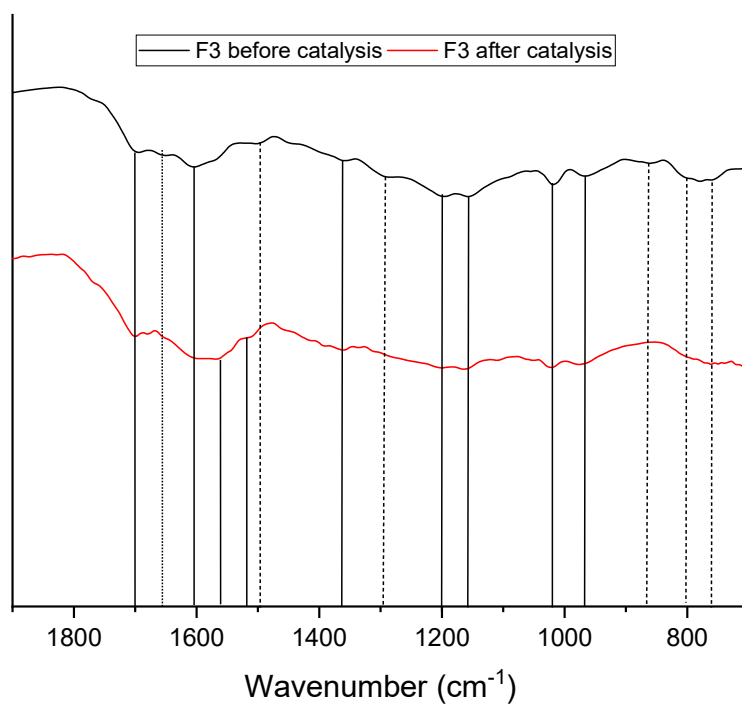

Figure S46: IR-spectrum of F3 before and after the catalysis

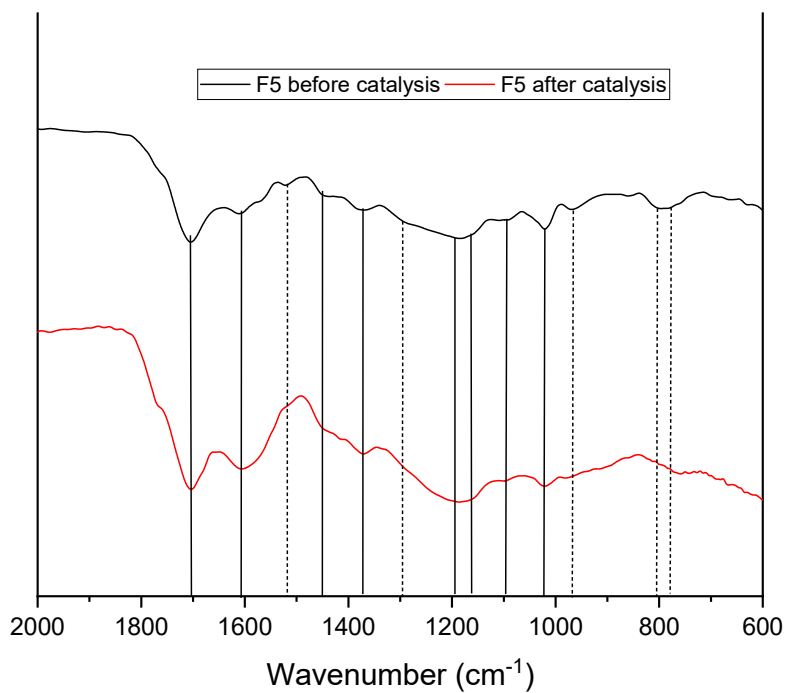

Figure S47: IR-spectrum of F5 before and after the catalysis

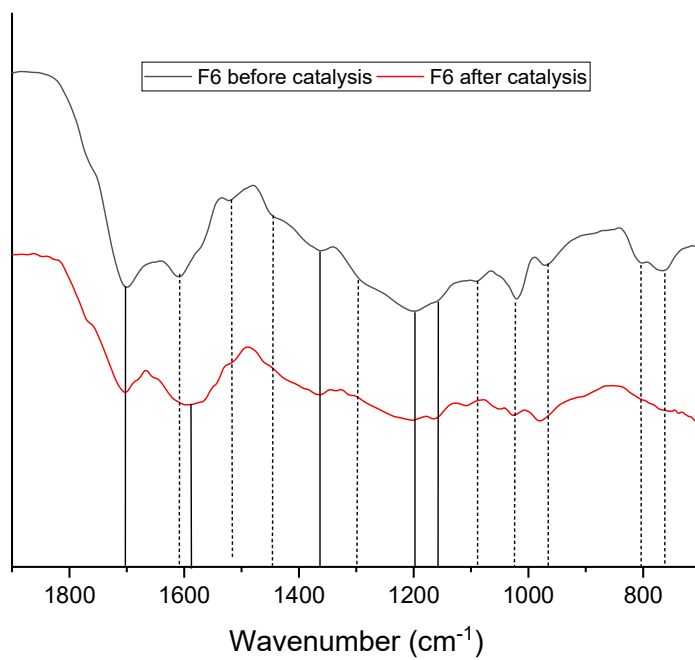

Figure S48: IR-spectrum of F6 before and after the catalysis

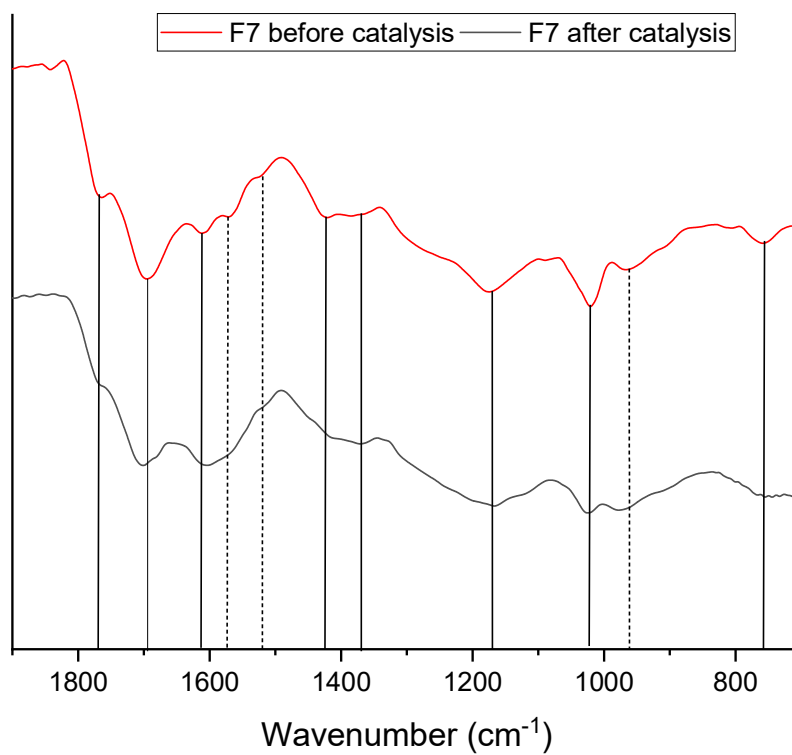

Figure S49: IR-spectrum of F7 before and after the catalysis

## Equations used for yield calculations

The conversions of sugars  $x_i$  were determined through equation 1:

$$x_i = \frac{c_{i,0} - c_i}{c_{i,0}} * 100 \quad (S1)$$

With  $c_{i,0}$  being the concentration before and  $c_i$  the concentration after reaction.

The carbon mass yields of the humin syntheses  $Y_{Cmass\%,Hi}$  were calculated using equation 2:

$$Y_{Cmass\%,Hi} = \frac{m_{Hi} * C_{Hi}}{m_{Si} * C_{Si}} * 100 \quad (S2)$$

With  $C_{Hi}$  being the mass percentage of carbon and  $m_{Hi}$  the mass of the product humins and  $m_{Si}$  and  $C_{Si}$  being the respective metrics for the educt sugars.

The yields of the reaction products  $Pi$  of humin conversion  $Y_{mass, Pi}$  were determined with the following equation:

$$Y_{mass, Pi} = \frac{m_{Pi}}{m_{Pi,max}} \quad (S3)$$

With  $m_{Pi}$  being the mass of the products and  $m_{Pi,max}$  being the maximum possible mass.

$m_{Pi}$  was calculated as the product of the concentration and the molar mass of the reaction product multiplied with the measured density of the reaction solution, to account for deviations in the density through the different densities of the reaction products.

$m_{Pi,max}$  was calculated using equation 4:

$$m_{Pi,max} = \frac{n_{Hi,C} / N_{C,Pi} * M_{Hi}}{m_{Hi} + m_{HPA-5} + m_{H_2O}} \quad (S4)$$

$N_{C,Pi}$  here is equivalent to the number of carbons contained in the reaction product and  $n_{Hi,C}$  is the amount of carbon contained in the humins used for conversion.  $n_{Hi,C}$  was determined using equation 5:

$$n_{Hi,C} = \frac{C_{Hi} * m_{Hi}}{M_{Carbon}} \quad (S5)$$
